# Supplementary material
Source: PubMed Central journal article supplement (PMC4764144)

## SUPPLEMENTARY DATA

### **Protein expression by SILAC mouse**

We used a previously described a SILAC method (Lanza IR, Zabielski P, Klaus KA, Morse DM, Heppelmann CJ, Bergen HR 3rd, Dasari S, Walrand S, Short KR, Johnson ML, Robinson MM, Schimke JM, Jakaitis DR, Asmann YW, Sun Z, Nair KS. Chronic caloric restriction preserves mitochondrial function in senescence without increasing mitochondrial biogenesis. *Cell Metab.*2012 Dec 5;16(6):777-88) for comparing the relative expression of quadriceps muscle tissue proteins between ND, STZ-I and STZ+I mice (n=6 per group). The reference labeled mice were generated by feeding female DBA2H strain mice (F0 parental generation) an in-house designed diet containing [<sup>13</sup>C<sub>6</sub>]-lysine stable isotope labeled amino acid (Cambridge Isotope Laboratories, Cambridge, MA) as the only source of biologically available lysine. When the plasma free lysine enrichment approached the value of that of the chow enrichment (by GC-MS/MS), all animals were bred to obtain fully labeled pups (F1 generation). Mice from F1 generation were put on [<sup>13</sup>C<sub>6</sub>]-lysine diet until sacrificed at 14 weeks. We observed >98% labeling of lysine in muscle tissue, measured at peptide level.

Quadriceps muscle samples from ND, STZ-I and STZ+I mice and fully labeled reference mice were pulverized into fine powder in liquid nitrogen. Muscle powder was suspended in RIPA buffer containing 5mM TCEP and protease and phosphatase inhibitors (Complete Mini protease inhibitors and PhosphoSTOP phosphatase inhibitors, ROCHE Applied Science, Indianapolis, IN) and sonicated on ice (Model 100 Sonic Dismembrator, Fisher Scientific, Waltham, MA). After incubation at 4°C for 30 minutes, samples were centrifuged at 15000g to remove cell debris. Protein content in the resulting supernatant was measured using Pierce 660nM Protein Assay Kit.

Samples were prepared for SDS-PAGE in NuPAGE LDS Sample Buffer with 5mM TCEP at a final protein concentration of 1µg/µl. After heating at 70°C for 10 minutes, samples from experimental animals were mixed in 1:1 (protein/protein) ratio with a reference sample obtained from a labeled animal. 15µg of each combined protein sample was resolved on NuPAGE Novex Bis-Tris Midi precast gels. ANOVA analysis of Vinculin reference protein expression data obtained by LC-MS/MS revealed no significant difference between the amounts of samples loaded in the lanes (Table S1). Gel lanes were cut into 8 sections and the excised gel fractions were incubated in 200 mM Tris for 30 minutes prior to destaining with 50 mM Tris/50% acetonitrile (ACN) for 2 hours. Fractions were then dehydrated with 100% ACN until gel pieces appeared opaque. Proteins were reduced with 20 mM DTT in 50 mM Tris for 60mins at 60°C, followed by dehydration with 100% ACN and alkylation with 40 mM iodoacetamide in 50 mM Tris for 60mins at room temperature. Proteins in the samples were digested overnight at 37°C using 0.2 ug of trypsin (Promega, Madison, WI) in 20 mM Tris and 0.0002% zwittergent 3-16. Peptides were extracted using 2% trifluoroacetic acid (TFA) for 30 minutes followed by two ACN extractions, each for another 30 minutes. The peptide-containing fractions were dried to completeness under vacuum and stored at -20°C until further analysis.

### **LC-MS/MS**

Samples were brought up in 0.15% formic acid (FA)/0.05% TFA/ 0.002% zwittergent 3-16. Peptides were loaded onto an OptiPak 0.25 uL cartridge (Optimize Technologies, Oregon City, OR), custom-packed with Michrom Magic C8 (5 µm, 200 Å), using a 15µL/min flow of 0.15% FA and 0.05 % TFA. After loading and washing, the column was placed in line with a 180mmX0.075mm spray tip packed with Magic C18 (5µ, 200Å, Michrom BioResources, Auburn, CA). After an initial hold for 5 minutes at 5% B, a gradient to 40%B in 60 minutes was performed, followed by a second gradient to 90% B before

## SUPPLEMENTARY DATA

re-equilibrating at initial conditions. Mobile phase A was water/ACN/FA (98/2/0.1 by volume). Mobile phase B was ACN/isopropanol/water/FA (80/10/10/0.1 by volume). Survey scans were acquired in the Orbitrap (Thermo Scientific Velos) at 60,000 resolving power using a target ion population of 1e6 charges. Data-dependent MS/MS was conducted on the top 5 doubly- or triply-charged precursors using an isolation width setting of 2.0, normalized collision energy of 35%, and a linear ion trap target ion population of 1e4 charges. Precursor masses selected for tandem MS experiments were placed on an exclusion list for 45 seconds.

### Elucidator analysis

Data files were imported into the Rosetta Elucidator software (Seattle, WA) and the multidimensional labeled-pair pipeline was used for analysis. Peptide peaks were detected from MS1 data and detected peaks were aligned across the sample runs of the same gel section. Peptide peaks with peak time score > 0.8, peak m/z score > 0.9, peak confidence score > 0.6, and charge state < 5 and > 1 were selected for identification. MS/MS spectra present in these peptide peaks were identified using Mascot database search engine (Matrix Science, London, UK) configured to use mouse SwissProt database appended with common contaminants and a reverse decoy database. Mascot was configured to use a peptide precursor tolerance of 10 ppm, fragment tolerance of 0.6 Da and a maximum of 2 missed cleavages. The software was instructed to use the following variable modifications during the search: carbamidomethylation of cysteine, oxidation of methionine, and SILAC labeled [<sup>13</sup>C<sub>6</sub>]-lysine. Peptide peaks were annotated using the PeptideProphet algorithm in Elucidator configured to use 5% FDR. SILAC labeled pairs were detected using up to three [<sup>13</sup>C<sub>6</sub>]-lysine labels with a 20 ppm m/z tolerance and 0.2 minute retention time tolerance. Light/heavy ratios were calculated for each labeled pair and the peptide ratios were merged into protein ratios for each mouse group using Elucidator's weighted statistics.

In the labeled-pair pipeline, Elucidator was designed to report differences between a pair of labeled and unlabeled groups. In our study, we used the SILAC labeled animal as an internal standard to normalize the data and compare the normalized ratios across the experimental conditions. To compare ND, STZ-I and STZ+I groups, a z-statistic was calculated from the difference between two log-ratios divided by the pooled error, and used to calculate a p-value as a measure of significance for the difference between any two groups. Peptide pairs with the highest detector signal had highest impact on the estimation of L/H protein ratio. Only the proteins present in all experimental animals with at least one "light" (unlabeled) and "heavy" ([<sup>13</sup>C<sub>6</sub>]-lysine labeled) peptide pair were used in the analysis. The L/H protein ratio value was calculated for each animal, and used to calculate the intragroup ratio estimation error ( $\sigma$ ) of a given protein.

$$\sigma_x = \frac{\log_{10} \frac{L}{H} \text{protein } x \text{ ratio}}{\frac{I_{H^x} - I_{L^x}}{\sqrt{\sigma_H^2 x + \sigma_L^2 x}}}$$

Where:

$\sigma_x$  – ratio estimation error for the protein x, log<sub>10</sub> scale.

$\log_{10} \frac{L}{H} \text{protein } x \text{ ratio}$  - "light" (sample) to "heavy" (reference) ratio of the protein x, log<sub>10</sub> scale.

$I_{L^x}$  – mean detector intensity of "light" (sample) version of protein x.

$I_{H^x}$  – mean detector intensity of "heavy" (reference) version of protein x.

$\sigma_L^2 x$  – error value for "light" (sample) version of protein x.

$\sigma_H^2 x$  – error value for "heavy" (reference) version of protein x.

## SUPPLEMENTARY DATA

The group ratio estimation error ( $\sigma$ ) of a given protein, together with intragroup ratio values were used to calculate individual protein p-value according to the equations:

$$s_p(A,B) = \sqrt{\frac{(2 * (\sigma_x A)^2) + (2 * (\sigma_x B)^2)}{n - 2}}$$

$$Z - test = \frac{\left( \log_{10} \frac{L}{H} \text{protein } x \text{ ratio } A \right) - \left( \log_{10} \frac{L}{H} \text{protein } x \text{ ratio } B \right)}{s_p(A,B)}$$

$$p - value = 2 * \left( 1 - \frac{1}{\sqrt{2\pi}} e^{-\frac{z-test^2}{2}} \right)$$

Where:

$s_p(A,B)$  – sample standard deviation between groups A and B, calculated from pooled variance.

$E \text{ protein } x A$  – Ratio estimation error for the protein x in group A

$E \text{ protein } x B$  – Ratio estimation error for the protein x in group B

n – total number of animals in both groups

$\frac{L}{H} \text{protein } x \text{ ratio } A$  – mean sample (light) to reference (heavy) ratio of the protein X in group A

The difference in the protein expression between the groups was calculated as a “ratio of the ratios” giving the relative change in the expression of the given protein between the experimental groups:

$$\text{Protein } x \text{ ratio } (A/B) = \frac{\frac{L}{H} \text{protein } x \text{ ratio } A}{\frac{L}{H} \text{protein } x \text{ ratio } B}$$

where “L/H protein x ratio A” is mean, weighted, L/H ratio of protein x in group A and “L/H protein x ratio B” is mean, weighted, L/H ratio of protein x in group B.

SUPPLEMENTARY DATA

**Supplementary Table S1.** Results of MS/MS analysis of Vinculin (VINC) loading control/housekeeping protein expression in experimental animals. The even mixing of experimental samples (light, L) with SILAC reference sample (heavy, H), is confirmed by the lack of statistical difference in Light/Heavy ratio value between animals (based on 5 L/H peptide pairs for each animal). The even loading of samples was proven by the analysis of light only (experimental) peptides (value based on mean signal intensity of 15 VINC light peptides per animal), which shows no statistical difference. N=6 per group.

| Group | VINC L (experimental)/H (reference) peptide ratio |       | VINC light (experimental) peptides intensity |          |
|-------|---------------------------------------------------|-------|----------------------------------------------|----------|
|       | Mean                                              | SD    | Mean                                         | SD       |
| ND    | 0.966                                             | 0.063 | 2.26E+05                                     | 2.54E+04 |
| STZ-I | 0.958                                             | 0.061 | 2.27E+05                                     | 3.31E+04 |
| STZ+I | 0.992                                             | 0.066 | 2.21E+05                                     | 3.70E+04 |

  

| ANOVA  | SS       | df | MS       | F     | p     | SS       | df | MS      | F     | p     |
|--------|----------|----|----------|-------|-------|----------|----|---------|-------|-------|
| Effect | 0        | 2  | 0        | 0.477 | 0.629 | 1.04E+8  | 2  | 5.22E+7 | 0.050 | 0.951 |
| Error  | 5.98E-02 | 15 | 3.99E-03 |       |       | 1.56E+10 | 15 | 1.04E+9 |       |       |

SUPPLEMENTARY DATA

**Supplementary Table S2A.** Individual protein differential expression data from figure **2A volcano plot (STZ-I vs. ND comparison)** of 149 significantly affected proteins implicated in skeletal muscle energy metabolism. Table lists protein symbols, names and accession numbers as given by UniProt database, together with their expression ratio (in log2 scale), p-value (base and in  $-\log_{10}$  scale) and Ingenuity IPA protein group affiliation (Group). Proteins are listed in the alphabetical order by their respective symbols.

| Symbol | Entrez Gene Name                                                                                     | Accession # | Log2 (STZ-I vs ND) | p-value (STZ-I vs ND) | $-\log_{10}$ p-value (STZ-I vs ND) | Group                           |
|--------|------------------------------------------------------------------------------------------------------|-------------|--------------------|-----------------------|------------------------------------|---------------------------------|
| ACAA2  | acetyl-CoA acyltransferase 2                                                                         | Q8BWT1      | -0.672             | 1.8E-42               | 41.738                             | FA metabolism                   |
| ACAD9  | acyl-CoA dehydrogenase family, member 9                                                              | Q3ULL9      | -0.418             | 2.3E-02               | 1.631                              | FA metabolism                   |
| ACADL  | acyl-CoA dehydrogenase, long chain                                                                   | P51174      | -0.461             | 4.7E-19               | 18.330                             | FA metabolism                   |
| ACADM  | acyl-CoA dehydrogenase, C-4 to C-12 straight chain                                                   | Q91WS8      | -0.512             | 8.0E-13               | 12.096                             | FA metabolism                   |
| ACADVL | acyl-CoA dehydrogenase, very long chain                                                              | B1AR27      | -0.246             | 2.2E-16               | 15.654                             | FA metabolism                   |
| ACAT1  | acetyl-CoA acetyltransferase 1                                                                       | Q8QZT1      | -0.44              | 7.9E-25               | 24.103                             | FA metabolism                   |
| ACO2   | aconitase 2, mitochondrial                                                                           | Q99KI0      | 0.073              | 3.8E-08               | 7.420                              | Respiratory chain/TCA cycle     |
| ACSL1  | acyl-CoA synthetase long-chain family member 1                                                       | P41216      | -0.235             | 5.8E-19               | 18.236                             | FA metabolism                   |
| ADCK3  | aarF domain containing kinase 3                                                                      | Q60936      | 0.285              | 3.6E-03               | 2.444                              |                                 |
| AGL    | amylo-alpha-1, 6-glucosidase, 4-alpha-glucanotransferase                                             | Q8CE68      | -0.125             | 4.5E-02               | 1.345                              | Glycolysis/Glycogen degradation |
| AIFM1  | apoptosis-inducing factor, mitochondrion-associated, 1                                               | Q9Z0X1      | -0.32              | 4.9E-03               | 2.309                              |                                 |
| ALDH2  | aldehyde dehydrogenase 2 family (mitochondrial)                                                      | P47738      | -0.156             | 9.1E-03               | 2.040                              | FA metabolism                   |
| ALDOA  | aldolase A, fructose-bisphosphate                                                                    | Q5FWB7      | 0.187              | 4.2E-06               | 5.381                              | Glycolysis/Glycogen degradation |
| ATP5A1 | ATP synthase, H <sup>+</sup> transporting, mitochondrial F1 complex, alpha subunit 1, cardiac muscle | Q03265      | -0.185             | 1.0E-07               | 7.001                              | Respiratory chain/TCA cycle     |
| ATP5B  | ATP synthase, H <sup>+</sup> transporting, mitochondrial F1 complex, beta polypeptide                | P56480      | -0.202             | 4.4E-16               | 15.353                             | Respiratory chain/TCA cycle     |
| ATP5C1 | ATP synthase, H <sup>+</sup> transporting, mitochondrial F1 complex, gamma polypeptide 1             | A2AKV3      | -0.15              | 5.2E-05               | 4.286                              | Respiratory chain/TCA cycle     |
| ATP5F1 | ATP synthase, H <sup>+</sup> transporting, mitochondrial Fo complex, subunit B1                      | Q80W36      | -0.238             | 6.7E-08               | 7.171                              | Respiratory chain/TCA cycle     |
| Atp5h  | ATP synthase, H <sup>+</sup> transporting, mitochondrial FO complex, subunit d                       | Q9DCX2      | -0.3               | 5.1E-12               | 11.292                             | Respiratory chain/TCA cycle     |
| ATP5I  | ATP synthase, H <sup>+</sup> transporting, mitochondrial Fo complex, subunit E                       | Q06185      | -0.211             | 2.9E-04               | 3.532                              | Respiratory chain/TCA cycle     |

SUPPLEMENTARY DATA

|        |                                                                                  |        |        |          |        |                             |
|--------|----------------------------------------------------------------------------------|--------|--------|----------|--------|-----------------------------|
| ATP5L  | ATP synthase, H <sup>+</sup> transporting, mitochondrial Fo complex, subunit G   | Q9CQY3 | -0.286 | 1.3E-04  | 3.876  | Respiratory chain/TCA cycle |
| ATP5O  | ATP synthase, H <sup>+</sup> transporting, mitochondrial F1 complex, O subunit   | Q9DB20 | -0.201 | 2.9E-05  | 4.544  | Respiratory chain/TCA cycle |
| CAPZA2 | capping protein (actin filament) muscle Z-line, alpha 2                          | P47754 | 0.707  | 5.6E-22  | 21.251 |                             |
| CASQ1  | calsequestrin 1 (fast-twitch, skeletal muscle)                                   | O09165 | 0.446  | 1.9E-04  | 3.712  |                             |
| CAT    | catalase                                                                         | P24270 | 1.398  | 1.5E-09  | 8.818  |                             |
| CD36   | CD36 molecule (thrombospondin receptor)                                          | Q08857 | 0.729  | 3.2E-14  | 13.495 | FA transport and uptake     |
| CHCHD3 | coiled-coil-helix-coiled-coil-helix domain containing 3                          | Q9D9P1 | -0.315 | 2.0E-04  | 3.699  |                             |
| CISD1  | CDGSH iron sulfur domain 1                                                       | Q91WS0 | -0.13  | 2.6E-02  | 1.578  |                             |
| CKMT2  | creatine kinase, mitochondrial 2 (sarcomeric)                                    | Q6P8J7 | -0.646 | 4.5E-88  | 87.347 |                             |
| COQ9   | coenzyme Q9 homolog (S. cerevisiae)                                              | Q8K1Z0 | -0.337 | 2.5E-09  | 8.595  | Respiratory chain/TCA cycle |
| COX1   | cytochrome c oxidase subunit I                                                   | Q9MD68 | -0.392 | 2.6E-09  | 8.588  | Respiratory chain/TCA cycle |
| COX2   | cytochrome c oxidase subunit II                                                  | P00405 | -0.331 | 1.6E-05  | 4.790  | Respiratory chain/TCA cycle |
| COX4I1 | cytochrome c oxidase subunit IV isoform 1                                        | P19783 | -0.321 | 2.6E-04  | 3.588  | Respiratory chain/TCA cycle |
| COX5A  | cytochrome c oxidase subunit Va                                                  | P12787 | -0.386 | 1.3E-02  | 1.876  | Respiratory chain/TCA cycle |
| COX5B  | cytochrome c oxidase subunit Vb                                                  | P19536 | -0.374 | 1.5E-04  | 3.824  | Respiratory chain/TCA cycle |
| COX6C  | cytochrome c oxidase subunit VIc                                                 | Q9CPQ1 | -0.398 | 3.3E-02  | 1.487  | Respiratory chain/TCA cycle |
| CPT1B  | carnitine palmitoyltransferase 1B (muscle)                                       | Q3UIM5 | -0.226 | 1.4E-10  | 9.842  | FA metabolism               |
| CPT2   | carnitine palmitoyltransferase 2                                                 | P52825 | -0.345 | 1.0E-04  | 4.000  | FA metabolism               |
| CRAT   | carnitine O-acetyltransferase                                                    | P47934 | -0.268 | 1.2E-10  | 9.907  |                             |
| CS     | citrate synthase                                                                 | Q9CZU6 | -0.211 | 3.0E-10  | 9.526  | Respiratory chain/TCA cycle |
| CYC1   | cytochrome c-1                                                                   | Q9D0M3 | -0.365 | 1.3E-05  | 4.903  | Respiratory chain/TCA cycle |
| CYCS   | cytochrome c, somatic                                                            | P62897 | -0.259 | 7.8E-09  | 8.111  | Respiratory chain/TCA cycle |
| DECR1  | 2,4-dienoyl CoA reductase 1, mitochondrial                                       | Q9CQ62 | -0.296 | 2.3E-07  | 6.646  |                             |
| DLAT   | dihydrolipoamide S-acetyltransferase                                             | Q8BMF4 | -0.251 | 3.6E-19  | 18.439 |                             |
| DLD    | dihydrolipoamide dehydrogenase                                                   | O08749 | -0.114 | 1.6E-04  | 3.801  | Respiratory chain/TCA cycle |
| DLST   | dihydrolipoamide S-succinyltransferase (E2 component of 2-oxo-glutarate complex) | Q9D2G2 | -0.318 | 1.1E-05  | 4.979  | Respiratory chain/TCA cycle |
| ECHS1  | enoyl CoA hydratase, short chain, 1, mitochondrial                               | Q8BH95 | -0.310 | 7.98E-03 | 2.098  | FA metabolism               |
| ECI1   | enoyl-CoA delta isomerase 1                                                      | Q8QZV3 | -0.289 | 6.8E-08  | 7.166  | FA metabolism               |

SUPPLEMENTARY DATA

|                    |                                                                                                                 |        |        |          |        |                                 |
|--------------------|-----------------------------------------------------------------------------------------------------------------|--------|--------|----------|--------|---------------------------------|
| ENO1               | enolase 1, (alpha)                                                                                              | P17182 | 0.167  | 1.8E-08  | 7.750  | Glycolysis/Glycogen degradation |
| ENO2               | enolase 2 (gamma, neuronal)                                                                                     | P17183 | 0.121  | 3.2E-04  | 3.498  | Glycolysis/Glycogen degradation |
| ENO3               | enolase 3 (beta, muscle)                                                                                        | P21550 | 0.113  | 5.8E-13  | 12.238 | Glycolysis/Glycogen degradation |
| ETFA               | electron-transfer-flavoprotein, alpha polypeptide                                                               | Q99LC5 | -0.286 | 3.8E-10  | 9.421  | Respiratory chain/TCA cycle     |
| ETFB               | electron-transfer-flavoprotein, beta polypeptide                                                                | Q9DCW4 | -0.373 | 3.6E-14  | 13.447 | Respiratory chain/TCA cycle     |
| FABP3              | fatty acid binding protein 3, muscle and heart (mammary-derived growth inhibitor)                               | Q5EBJ0 | 0.29   | 1.6E-06  | 5.807  | FA transport and uptake         |
| FABP4              | fatty acid binding protein 4, adipocyte                                                                         | Q542H7 | 0.53   | 3.9E-26  | 25.411 | FA transport and uptake         |
| FBP2               | fructose-1,6-bisphosphatase 2                                                                                   | Q3TKP4 | 0.431  | 1.8E-07  | 6.745  | Glycolysis/Glycogen degradation |
| FH                 | fumarate hydratase                                                                                              | Q3UIA9 | -0.237 | 3.2E-04  | 3.498  | Respiratory chain/TCA cycle     |
| Gapdh/LOC100042025 | glyceraldehyde-3-phosphate dehydrogenase                                                                        | P16858 | 0.102  | 1.3E-14  | 13.893 | Glycolysis/Glycogen degradation |
| GBAS               | glioblastoma amplified sequence                                                                                 | Q3TD78 | -0.304 | 1.2E-04  | 3.928  |                                 |
| GLUD1              | glutamate dehydrogenase 1                                                                                       | P26443 | 0.206  | 2.4E-02  | 1.613  |                                 |
| GOT2 (FABPpm)      | glutamic-oxaloacetic transaminase 2, mitochondrial (aspartate aminotransferase 2)                               | P05202 | -0.377 | 1.1E-19  | 18.963 | FA transport and uptake         |
| GPD1               | glycerol-3-phosphate dehydrogenase 1 (soluble)                                                                  | P13707 | 0.136  | 1.1E-13  | 12.971 | Glycolysis/Glycogen degradation |
| GPD2               | glycerol-3-phosphate dehydrogenase 2 (mitochondrial)                                                            | Q64521 | 0.11   | 1.8E-02  | 1.745  | Glycolysis/Glycogen degradation |
| GPI                | glucose-6-phosphate isomerase                                                                                   | P06745 | 0.145  | 4.3E-14  | 13.369 | Glycolysis/Glycogen degradation |
| GSTM5              | glutathione S-transferase mu 5                                                                                  | P10649 | 0.303  | 3.2E-07  | 6.495  |                                 |
| HADH               | hydroxyacyl-CoA dehydrogenase hydroxyacyl-CoA                                                                   | Q61425 | -0.334 | 8.7E-05  | 4.060  | FA metabolism                   |
| HADHA              | dehydrogenase/3-ketoacyl-CoA thiolase/enoyl-CoA hydratase (trifunctional protein), alpha subunit                | Q8BMS1 | -0,213 | 1,58E-12 | 11,802 | FA metabolism                   |
| HADHB              | hydroxyacyl-CoA dehydrogenase/3-ketoacyl-CoA thiolase/enoyl-CoA hydratase (trifunctional protein), beta subunit | Q99JY0 | -0.162 | 2.1E-13  | 12.688 | FA metabolism                   |
| HIBADH             | 3-hydroxyisobutyrate dehydrogenase                                                                              | Q99L13 | -0.38  | 4.8E-03  | 2.316  |                                 |
| HIBCH              | 3-hydroxyisobutyryl-CoA hydrolase                                                                               | Q8QZS1 | -0.255 | 1.7E-03  | 2.767  |                                 |
| HSD17B10/M/SCHAD   | hydroxysteroid (17-beta) dehydrogenase 10 / short chain L-3-hydroxyacyl-CoA dehydrogenase                       | Q99N15 | -0.162 | 3.3E-03  | 2.479  | FA metabolism                   |
| HSP90AB1           | heat shock protein 90kDa alpha (cytosolic), class B member 1                                                    | Q71LX8 | -0.291 | 1.4E-13  | 12.854 |                                 |
| HSPA9              | heat shock 70kDa protein 9                                                                                      | P38647 | -0.423 | 9.3E-20  | 19.030 |                                 |

SUPPLEMENTARY DATA

|         |                                                                |        |        |         |        |                                           |
|---------|----------------------------------------------------------------|--------|--------|---------|--------|-------------------------------------------|
|         | (mortalin)                                                     |        |        |         |        |                                           |
| HSPD1   | heat shock 60kDa protein 1 (chaperonin)                        | P63038 | -0.248 | 3.1E-18 | 17.509 |                                           |
| HSPE1   | heat shock 10kDa protein 1 (chaperonin 10)                     | Q64433 | -0.348 | 7.8E-04 | 3.107  |                                           |
| IDH2    | isocitrate dehydrogenase 2 (NADP+), mitochondrial              | P54071 | 0.472  | 3.9E-19 | 18.409 |                                           |
| IDH3A   | isocitrate dehydrogenase 3 (NAD+) alpha                        | Q9D6R2 | -0.303 | 4.2E-15 | 14.375 | Respiratory chain/TCA cycle               |
| IDH3B   | isocitrate dehydrogenase 3 (NAD+) beta                         | Q91VA7 | -0.319 | 3.5E-24 | 23.457 | Respiratory chain/TCA cycle               |
| IDH3G   | isocitrate dehydrogenase 3 (NAD+) gamma                        | P70404 | -0.392 | 2.1E-10 | 9.688  | Respiratory chain/TCA cycle               |
| IMMT    | inner membrane protein, mitochondrial                          | Q3TVZ5 | -0.321 | 3.7E-39 | 38.431 |                                           |
| IVD     | isovaleryl-CoA dehydrogenase                                   | Q9JHI5 | -0.343 | 3.3E-03 | 2.481  | FA metabolism                             |
| LETM1   | leucine zipper-EF-hand containing transmembrane protein 1      | Q9Z2I0 | -0.5   | 9.4E-05 | 4.028  |                                           |
| LRPPRC  | leucine-rich pentatricopeptide repeat containing               | Q99KF9 | -0.711 | 4.6E-04 | 3.339  |                                           |
| MDH1    | malate dehydrogenase 1, NAD (soluble)                          | P14152 | 0.155  | 6.9E-03 | 2.161  | Glycolysis/Glycogen degradation/TCA Cycle |
| MDH2    | malate dehydrogenase 2, NAD (mitochondrial)                    | P08249 | -0.198 | 9.9E-14 | 13.004 | Respiratory chain/TCA cycle               |
| MPC2    | mitochondrial pyruvate carrier 2                               | Q9D023 | -0.514 | 3.4E-06 | 5.474  |                                           |
| ND5     | NADH dehydrogenase, subunit 5 (complex I)                      | Q9MD82 | -0.447 | 2.1E-03 | 2.682  | Respiratory chain/TCA cycle               |
| NDUFA10 | NADH dehydrogenase (ubiquinone) 1 alpha subcomplex, 10, 42kDa  | Q99LC3 | -0.334 | 4.9E-09 | 8.311  | Respiratory chain/TCA cycle               |
| NDUFA12 | NADH dehydrogenase (ubiquinone) 1 alpha subcomplex, 12         | Q5M9K5 | -0.375 | 1.7E-02 | 1.759  | Respiratory chain/TCA cycle               |
| NDUFA13 | NADH dehydrogenase (ubiquinone) 1 alpha subcomplex, 13         | Q9ERS2 | -0.367 | 3.2E-05 | 4.498  | Respiratory chain/TCA cycle               |
| NDUFA2  | NADH dehydrogenase (ubiquinone) 1 alpha subcomplex, 2, 8kDa    | Q9CQ75 | -0.485 | 8.4E-04 | 3.077  | Respiratory chain/TCA cycle               |
| NDUFA5  | NADH dehydrogenase (ubiquinone) 1 alpha subcomplex, 5, 13kDa   | Q9CPP6 | -0.414 | 3.0E-08 | 7.527  | Respiratory chain/TCA cycle               |
| NDUFA6  | NADH dehydrogenase (ubiquinone) 1 alpha subcomplex, 6, 14kDa   | Q9CQZ5 | -0.371 | 6.0E-12 | 11.223 | Respiratory chain/TCA cycle               |
| NDUFA7  | NADH dehydrogenase (ubiquinone) 1 alpha subcomplex, 7, 14.5kDa | Q9Z1P6 | -0.432 | 4.7E-02 | 1.325  | Respiratory chain/TCA cycle               |
| NDUFA8  | NADH dehydrogenase (ubiquinone) 1 alpha subcomplex, 8, 19kDa   | Q9DCJ5 | -0.363 | 1.3E-05 | 4.879  | Respiratory chain/TCA cycle               |
| NDUFA9  | NADH dehydrogenase (ubiquinone) 1 alpha subcomplex, 9, 39kDa   | Q9DC69 | -0.435 | 1.6E-07 | 6.785  | Respiratory chain/TCA cycle               |
| NDUFB11 | NADH dehydrogenase                                             | B1AV40 | -0.521 | 3.9E-02 | 1.405  | Respiratory chain/TCA                     |



SUPPLEMENTARY DATA

|        |                                                                                      |        |        |         |        |                             |
|--------|--------------------------------------------------------------------------------------|--------|--------|---------|--------|-----------------------------|
|        | (ubiquinone) 1 beta subcomplex, 11, 17.3kDa<br>NADH dehydrogenase                    |        |        |         |        | cycle                       |
| NDUFB3 | (ubiquinone) 1 beta subcomplex, 3, 12kDa<br>NADH dehydrogenase                       | Q9CQZ6 | -0.432 | 1.8E-03 | 2.757  | Respiratory chain/TCA cycle |
| NDUFB4 | (ubiquinone) 1 beta subcomplex, 4, 15kDa<br>NADH dehydrogenase                       | Q9DBH2 | -0.395 | 1.4E-02 | 1.863  | Respiratory chain/TCA cycle |
| NDUFB5 | (ubiquinone) 1 beta subcomplex, 5, 16kDa<br>NADH dehydrogenase                       | Q9CQH3 | -0.332 | 4.4E-10 | 9.353  | Respiratory chain/TCA cycle |
| NDUFB7 | (ubiquinone) 1 beta subcomplex, 7, 18kDa<br>NADH dehydrogenase                       | Q9CR61 | -0.581 | 1.6E-02 | 1.788  | Respiratory chain/TCA cycle |
| NDUFB8 | (ubiquinone) 1 beta subcomplex, 8, 19kDa<br>NADH dehydrogenase                       | Q9D6J5 | -0.301 | 3.9E-02 | 1.407  | Respiratory chain/TCA cycle |
| NDUFC2 | (ubiquinone) 1, subcomplex unknown, 2, 14.5kDa<br>NADH dehydrogenase                 | Q9D846 | -0.267 | 4.8E-02 | 1.316  | Respiratory chain/TCA cycle |
| NDUFS1 | (ubiquinone) Fe-S protein 1, 75kDa (NADH-coenzyme Q reductase)<br>NADH dehydrogenase | Q91VD9 | -0.333 | 2.0E-15 | 14.699 | Respiratory chain/TCA cycle |
| NDUFS2 | (ubiquinone) Fe-S protein 2, 49kDa (NADH-coenzyme Q reductase)<br>NADH dehydrogenase | Q91WD5 | -0.327 | 2.9E-09 | 8.536  | Respiratory chain/TCA cycle |
| NDUFS3 | (ubiquinone) Fe-S protein 3, 30kDa (NADH-coenzyme Q reductase)<br>NADH dehydrogenase | Q9DCT2 | -0.399 | 2.9E-02 | 1.536  | Respiratory chain/TCA cycle |
| NDUFS4 | (ubiquinone) Fe-S protein 4, 18kDa (NADH-coenzyme Q reductase)<br>NADH dehydrogenase | Q9CXZ1 | -0.312 | 3.0E-05 | 4.529  | Respiratory chain/TCA cycle |
| NDUFS5 | (ubiquinone) Fe-S protein 5, 15kDa (NADH-coenzyme Q reductase)<br>NADH dehydrogenase | Q99LY9 | -0.415 | 2.8E-03 | 2.561  | Respiratory chain/TCA cycle |
| NDUFS6 | (ubiquinone) Fe-S protein 6, 13kDa (NADH-coenzyme Q reductase)<br>NADH dehydrogenase | P52503 | -0.418 | 1.4E-02 | 1.851  | Respiratory chain/TCA cycle |
| NDUFV1 | (ubiquinone) flavoprotein 1, 51kDa<br>NADH dehydrogenase                             | Q91YT0 | -0.325 | 9.3E-14 | 13.032 | Respiratory chain/TCA cycle |
| NDUFV2 | (ubiquinone) flavoprotein 2, 24kDa<br>NADH dehydrogenase                             | Q9D6J6 | -0.41  | 1.8E-02 | 1.742  | Respiratory chain/TCA cycle |
| OGDH   | oxoglutarate (alpha-ketoglutarate) dehydrogenase (lipoamide)                         | Q60597 | -0.215 | 6.7E-08 | 7.171  | Respiratory chain/TCA cycle |
| OXCT1  | 3-oxoacid CoA transferase 1                                                          | Q9D0K2 | -0.52  | 1.9E-21 | 20.726 |                             |
| PARK7  | parkinson protein 7                                                                  | Q99LX0 | 0.218  | 2.1E-05 | 4.682  |                             |

SUPPLEMENTARY DATA

|                 |                                                                                             |        |        |         |        |                                 |
|-----------------|---------------------------------------------------------------------------------------------|--------|--------|---------|--------|---------------------------------|
| PDHA1           | pyruvate dehydrogenase (lipoamide) alpha 1                                                  | Q3UFJ3 | -0.392 | 3.5E-04 | 3.457  | Respiratory chain/TCA cycle     |
| PDK4            | pyruvate dehydrogenase kinase, isozyme 4                                                    | O70571 | 3.148  | 9.8E-05 | 4.011  |                                 |
| PDPR            | pyruvate dehydrogenase phosphatase regulatory subunit                                       | Q7TSQ8 | -0.412 | 2.1E-10 | 9.686  |                                 |
| PFKM            | phosphofructokinase, muscle                                                                 | P47857 | 0.072  | 2.5E-04 | 3.609  | Glycolysis/Glycogen degradation |
| PGAM2           | phosphoglycerate mutase 2 (muscle)                                                          | Q5NCI4 | 0.085  | 2.5E-06 | 5.602  | Glycolysis/Glycogen degradation |
| PGK1            | phosphoglycerate kinase 1                                                                   | P09411 | 0.242  | 2.4E-15 | 14.613 | Glycolysis/Glycogen degradation |
| PGM1            | phosphoglucomutase 1                                                                        | Q3UGE3 | 0.205  | 9.2E-09 | 8.034  | Glycolysis/Glycogen degradation |
| PHB             | prohibitin                                                                                  | Q5SQG5 | -0.248 | 1.2E-04 | 3.917  |                                 |
| Pkm             | pyruvate kinase, muscle                                                                     | P52480 | 0.097  | 6.8E-05 | 4.168  | Glycolysis/Glycogen degradation |
| PRDX5           | peroxiredoxin 5                                                                             | Q9D6X2 | -0.299 | 4.8E-08 | 7.315  |                                 |
| PYGB            | phosphorylase, glycogen; brain                                                              | Q3UGT5 | 0.285  | 8.5E-07 | 6.073  | Glycolysis/Glycogen degradation |
| PYGM            | phosphorylase, glycogen, muscle                                                             | Q9WUB3 | 0.256  | 1.1E-15 | 14.955 | Glycolysis/Glycogen degradation |
| SDHA            | succinate dehydrogenase complex, subunit A, flavoprotein (Fp)                               | Q8K2B3 | -0.298 | 6.2E-21 | 20.211 | Respiratory chain/TCA cycle     |
| SDHB            | succinate dehydrogenase complex, subunit B, iron sulfur (Ip)                                | A2AA77 | -0.302 | 1.4E-09 | 8.848  | Respiratory chain/TCA cycle     |
| SDHC            | succinate dehydrogenase complex, subunit C, integral membrane protein, 15kDa                | Q5XK33 | -0.522 | 3.2E-03 | 2.498  | Respiratory chain/TCA cycle     |
| SLC25A11        | solute carrier family 25 (mitochondrial carrier; oxoglutarate carrier), member 11           | Q5SX48 | -0.388 | 7.8E-10 | 9.109  |                                 |
| SLC25A12        | solute carrier family 25 (aspartate/glutamate carrier), member 12                           | Q8BH59 | -0.176 | 8.5E-19 | 18.070 |                                 |
| SLC25A3         | solute carrier family 25 (mitochondrial carrier; phosphate carrier), member 3               | Q8VEM8 | -0.348 | 8.6E-17 | 16.068 |                                 |
| SLC25A4         | solute carrier family 25 (mitochondrial carrier; adenine nucleotide translocator), member 4 | P48962 | -0.233 | 1.0E-04 | 3.987  |                                 |
| SLC25A5         | solute carrier family 25 (mitochondrial carrier; adenine nucleotide translocator), member 5 | P51881 | -0.209 | 4.9E-05 | 4.313  |                                 |
| SLC27A1 (FATP1) | solute carrier family 27 (fatty acid transporter), member 1                                 | Q3TP13 | 0.413  | 2.0E-03 | 2.693  | FA transport and uptake         |
| SOD1            | superoxide dismutase 1, soluble                                                             | Q8C355 | 0.213  | 9.2E-07 | 6.038  |                                 |
| SOD2            | superoxide dismutase 2, mitochondrial                                                       | P09671 | -0.305 | 8.3E-07 | 6.081  | Respiratory chain/TCA cycle     |
| SUCLA2          | succinate-CoA ligase, ADP-forming, beta subunit                                             | Q3U6C7 | -0.24  | 3.2E-11 | 10.492 | Respiratory chain/TCA cycle     |

## SUPPLEMENTARY DATA

|         |                                                                                             |        |        |         |        |                                 |
|---------|---------------------------------------------------------------------------------------------|--------|--------|---------|--------|---------------------------------|
| SUCLG1  | succinate-CoA ligase, alpha subunit                                                         | Q9WUM5 | -0.246 | 2.1E-11 | 10.680 | Respiratory chain/TCA cycle     |
| TPI1    | triosephosphate isomerase 1                                                                 | P17751 | 0.172  | 3.9E-18 | 17.413 | Glycolysis/Glycogen degradation |
| TRAP1   | TNF receptor-associated protein 1                                                           | Q9CQN1 | -0.462 | 4.5E-02 | 1.352  |                                 |
| TUFM    | Tu translation elongation factor, mitochondrial                                             | Q8BFR5 | -0.179 | 1.6E-05 | 4.801  |                                 |
| UQCRB   | ubiquinol-cytochrome c reductase binding protein                                            | Q9D855 | -0.399 | 2.1E-09 | 8.684  | Respiratory chain/TCA cycle     |
| UQCRC1  | ubiquinol-cytochrome c reductase core protein I                                             | Q3THM1 | -0.23  | 8.3E-07 | 6.082  | Respiratory chain/TCA cycle     |
| UQCRC2  | ubiquinol-cytochrome c reductase core protein II                                            | Q9DB77 | -0.254 | 1.2E-19 | 18.914 | Respiratory chain/TCA cycle     |
| UQCRFS1 | ubiquinol-cytochrome c reductase, Rieske iron-sulfur polypeptide 1                          | Q9CR68 | -0.331 | 5.3E-31 | 30.276 | Respiratory chain/TCA cycle     |
| VDAC1   | voltage-dependent anion channel 1                                                           | Q60932 | -0.159 | 2.1E-05 | 4.680  |                                 |
| VDAC2   | voltage-dependent anion channel 2                                                           | Q60930 | -0.165 | 3.6E-04 | 3.450  |                                 |
| YWHAE   | tyrosine 3-monooxygenase/tryptophan 5-monooxygenase activation protein, epsilon polypeptide | A2ACM8 | 0.132  | 2.9E-04 | 3.533  |                                 |
| YWHAZ   | tyrosine 3-monooxygenase/tryptophan 5-monooxygenase activation protein, zeta polypeptide    | Q8BWN0 | 0.139  | 4.3E-03 | 2.366  |                                 |

SUPPLEMENTARY DATA

**Supplementary Table S2B.** Individual protein differential expression data from figure **2B volcano plot (STZ+I vs. STZ-I comparison)** of 77 significantly affected proteins implicated in skeletal muscle energy metabolism. Table lists protein symbols, names and accession numbers as given by UniProt database, together with their expression ratio (in log2 scale), p-value (base and in  $-\log_{10}$  scale) and Ingenuity IPA protein group affiliation (Group). Proteins are listed in the alphabetical order by their respective symbols.

| Symbol | Entrez Gene Name                                                                                     | Accession # | Log2 (STZ+I vs STZ-I) | p-value (STZ+I vs STZ-I) | $-\log_{10}$ p-value (STZ+I vs STZ-I) | Group                           |
|--------|------------------------------------------------------------------------------------------------------|-------------|-----------------------|--------------------------|---------------------------------------|---------------------------------|
| ACAA2  | acetyl-CoA acyltransferase 2                                                                         | Q8BWT1      | 0.149                 | 3.7E-03                  | 2.431                                 | FA metabolism                   |
| ACADL  | acyl-CoA dehydrogenase, long chain                                                                   | P51174      | -0.196                | 2.9E-04                  | 3.538                                 | FA metabolism                   |
| ACADVL | acyl-CoA dehydrogenase, very long chain                                                              | B1AR27      | -0.110                | 3.1E-02                  | 1.509                                 | FA metabolism                   |
| ACAT1  | acetyl-CoA acetyltransferase 1                                                                       | Q8QZT1      | 0.145                 | 4.4E-04                  | 3.361                                 | FA metabolism                   |
| ACSL1  | acyl-CoA synthetase long-chain family member 1                                                       | P41216      | -0.221                | 3.4E-10                  | 9.466                                 | FA metabolism                   |
| ADCK3  | aarF domain containing kinase 3                                                                      | Q60936      | -0.270                | 2.0E-02                  | 1.701                                 |                                 |
| ADH5   | alcohol dehydrogenase 5 (class III), chi polypeptide                                                 | Q6P5I3      | -0.139                | 3.9E-02                  | 1.415                                 | FA metabolism                   |
| ALDH2  | aldehyde dehydrogenase 2 family (mitochondrial)                                                      | P47738      | -0.297                | 5.1E-06                  | 5.297                                 | FA metabolism                   |
| ALDOA  | aldolase A, fructose-bisphosphate                                                                    | Q5FWB7      | -0.161                | 5.6E-05                  | 4.249                                 | Glycolysis/Glycogen degradation |
| ATP5A1 | ATP synthase, H <sup>+</sup> transporting, mitochondrial F1 complex, alpha subunit 1, cardiac muscle | D3Z6F5      | 0.067                 | 3.8E-02                  | 1.425                                 | Respiratory chain/TCA cycle     |
| ATP5B  | ATP synthase, H <sup>+</sup> transporting, mitochondrial F1 complex, beta polypeptide                | P56480      | 0.075                 | 1.0E-03                  | 2.991                                 | Respiratory chain/TCA cycle     |
| CASQ1  | calsequestrin 1 (fast-twitch, skeletal muscle)                                                       | O09165      | -0.427                | 3.0E-04                  | 3.524                                 |                                 |
| CAT    | catalase                                                                                             | P24270      | -1.341                | 8.7E-09                  | 8.062                                 |                                 |
| CD36   | CD36 molecule (thrombospondin receptor)                                                              | Q08857      | -0.615                | 6.0E-17                  | 16.223                                | FA uptake and transport         |
| CKMT2  | creatine kinase, mitochondrial 2 (sarcomeric)                                                        | Q6P8J7      | 0.267                 | 2.2E-16                  | 15.654                                |                                 |
| CS     | citrate synthase                                                                                     | Q9CZU6      | 0.088                 | 9.3E-03                  | 2.031                                 | Respiratory chain/TCA cycle     |
| DECR1  | 2,4-dienoyl CoA reductase 1, mitochondrial                                                           | Q9CQ62      | -0.135                | 2.5E-02                  | 1.607                                 |                                 |
| ECH1   | enoyl CoA hydratase 1, peroxisomal                                                                   | O35459      | -0.427                | 3.5E-02                  | 1.460                                 | FA metabolism                   |
| ECI1   | enoyl-CoA delta isomerase 1                                                                          | Q8QZV3      | -0.151                | 3.2E-04                  | 3.492                                 | FA metabolism                   |
| ENO1   | enolase 1, (alpha)                                                                                   | P17182      | -0.201                | 3.6E-13                  | 12.447                                | Glycolysis/Glycogen degradation |
| ENO2   | enolase 2 (gamma, neuronal)                                                                          | P17183      | -0.365                | 1.1E-05                  | 4.967                                 | Glycolysis/Glycogen degradation |
| ENO3   | enolase 3 (beta, muscle)                                                                             | P21550      | -0.417                | 8.2E-34                  | 33.085                                | Glycolysis/Glycogen degradation |

SUPPLEMENTARY DATA

|                    |                                                                                                                 |        |        |         |        |                                 |
|--------------------|-----------------------------------------------------------------------------------------------------------------|--------|--------|---------|--------|---------------------------------|
| ETFA               | electron-transfer-flavoprotein, alpha polypeptide                                                               | Q99LC5 | -0.117 | 1.1E-03 | 2.943  | Respiratory chain/TCA cycle     |
| ETFB               | electron-transfer-flavoprotein, beta polypeptide                                                                | Q9DCW4 | -0.119 | 3.4E-04 | 3.467  | Respiratory chain/TCA cycle     |
| FABP3              | fatty acid binding protein 3, muscle and heart (mammary-derived growth inhibitor)                               | Q5EBJ0 | -0.318 | 1.2E-07 | 6.939  | FA uptake and transport         |
| FABP4              | fatty acid binding protein 4, adipocyte                                                                         | Q542H7 | -0.873 | 6.7E-81 | 80.177 | FA uptake and transport         |
| FBP2               | fructose-1,6-bisphosphatase 2                                                                                   | Q3TKP4 | -0.378 | 2.8E-06 | 5.554  | Glycolysis/Glycogen degradation |
| Gapdh/LOC100042025 | glyceraldehyde-3-phosphate dehydrogenase                                                                        | P16858 | -0.105 | 9.6E-08 | 7.016  | Glycolysis/Glycogen degradation |
| GARS               | glycyl-tRNA synthetase glutamic-oxaloacetic                                                                     | Q9CZD3 | -0.182 | 4.0E-02 | 1.397  |                                 |
| GOT2               | transaminase 2, mitochondrial (aspartate aminotransferase 2)                                                    | P05202 | 0.126  | 1.4E-03 | 2.870  | FA uptake and transport         |
| GPD1               | glycerol-3-phosphate dehydrogenase 1 (soluble)                                                                  | P13707 | -0.169 | 3.9E-07 | 6.411  | Glycolysis/Glycogen degradation |
| GPD2               | glycerol-3-phosphate dehydrogenase 2 (mitochondrial)                                                            | Q64521 | 0.115  | 3.4E-02 | 1.469  | Respiratory chain/TCA cycle     |
| GPI                | glucose-6-phosphate isomerase                                                                                   | P06745 | -0.143 | 6.7E-14 | 13.173 | Glycolysis/Glycogen degradation |
| GSTM5              | glutathione S-transferase mu 5                                                                                  | P10649 | -0.255 | 1.9E-03 | 2.730  |                                 |
| HADH               | hydroxyacyl-CoA dehydrogenase hydroxyacyl-CoA                                                                   | Q61425 | -0.169 | 3.1E-02 | 1.510  | FA metabolism                   |
| HADHA              | dehydrogenase/3-ketoacyl-CoA thiolase/enoyl-CoA hydratase (trifunctional protein), alpha subunit                | Q8BMS1 | -0.134 | 4.4E-13 | 12.358 | FA metabolism                   |
| HADHB              | hydroxyacyl-CoA dehydrogenase/3-ketoacyl-CoA thiolase/enoyl-CoA hydratase (trifunctional protein), beta subunit | Q99JY0 | -0.150 | 1.9E-08 | 7.730  | FA metabolism                   |
| HK2                | hexokinase 2                                                                                                    | O08528 | 0.238  | 2.0E-02 | 1.693  |                                 |
| HSP90AB1           | heat shock protein 90kDa alpha (cytosolic), class B member 1                                                    | Q71LX8 | 0.257  | 3.9E-13 | 12.411 |                                 |
| HSPA9              | heat shock 70kDa protein 9 (mortalin)                                                                           | P38647 | 0.158  | 3.1E-04 | 3.506  |                                 |
| HSPD1              | heat shock 60kDa protein 1 (chaperonin)                                                                         | P63038 | 0.063  | 4.7E-02 | 1.332  |                                 |
| IDH2               | isocitrate dehydrogenase 2 (NADP+), mitochondrial                                                               | P54071 | -0.333 | 3.5E-18 | 17.452 |                                 |
| IDH3A              | isocitrate dehydrogenase 3 (NAD+) alpha                                                                         | Q9D6R2 | 0.141  | 9.7E-04 | 3.011  | Respiratory chain/TCA cycle     |
| IDH3B              | isocitrate dehydrogenase 3 (NAD+) beta                                                                          | Q91VA7 | 0.130  | 7.0E-04 | 3.152  | Respiratory chain/TCA cycle     |
| IDH3G              | isocitrate dehydrogenase 3 (NAD+) gamma                                                                         | P70404 | 0.157  | 3.4E-02 | 1.469  | Respiratory chain/TCA cycle     |
| IVD                | isovaleryl-CoA dehydrogenase                                                                                    | Q9JHI5 | 0.282  | 3.7E-03 | 2.433  | FA metabolism                   |
| MDH2               | malate dehydrogenase 2, NAD (mitochondrial)                                                                     | P08249 | 0.081  | 1.6E-06 | 5.799  | Respiratory chain/TCA cycle     |
| ME1                | malic enzyme 1, NADP(+)-dependent, cytosolic                                                                    | Q921S3 | -0.221 | 2.3E-05 | 4.648  | Glycolysis/Glycogen degradation |

SUPPLEMENTARY DATA

|                 |                                                                                             |        |        |         |        |                                 |
|-----------------|---------------------------------------------------------------------------------------------|--------|--------|---------|--------|---------------------------------|
| MPC2            | mitochondrial pyruvate carrier 2                                                            | Q9D023 | 0.251  | 2.0E-02 | 1.710  |                                 |
|                 | NADH dehydrogenase (ubiquinone) Fe-S protein 1, 75kDa (NADH-coenzyme Q reductase)           | Q91VD9 | 0.112  | 6.7E-03 | 2.175  | Respiratory chain/TCA cycle     |
| NDUFS1          | NADH dehydrogenase (ubiquinone) flavoprotein 1, 51kDa                                       | Q91YT0 | 0.119  | 2.8E-03 | 2.554  | Respiratory chain/TCA cycle     |
| NDUFV1          | 3-oxoacid CoA transferase 1                                                                 | Q9D0K2 | 0.308  | 1.2E-09 | 8.921  |                                 |
| OXCT1           | parkinson protein 7                                                                         | Q99LX0 | -0.238 | 7.0E-07 | 6.157  |                                 |
| PARK7           | pyruvate dehydrogenase kinase, isozyme 4                                                    | O70571 | -2.468 | 4.7E-07 | 6.333  |                                 |
| PDK4            | pyruvate dehydrogenase phosphatase regulatory subunit                                       | Q7TSQ8 | 0.301  | 2.3E-02 | 1.638  |                                 |
| PDPR            | phosphofructokinase, muscle                                                                 | P47857 | 0.104  | 2.0E-08 | 7.701  | Glycolysis/Glycogen degradation |
| PFKM            | phosphoglycerate mutase 2 (muscle)                                                          | Q5NCI4 | -0.139 | 2.9E-04 | 3.533  | Glycolysis/Glycogen degradation |
| PGAM2           | phosphoglucomutase 1                                                                        | Q3UGE3 | -0.207 | 9.2E-09 | 8.034  | Glycolysis/Glycogen degradation |
| PGM1            | pyruvate kinase, muscle                                                                     | P52480 | -0.110 | 1.6E-05 | 4.796  | Glycolysis/Glycogen degradation |
| Pkm             | phosphorylase, glycogen; brain                                                              | Q3UGT5 | -0.280 | 2.5E-06 | 5.599  | Glycolysis/Glycogen degradation |
| PYGB            | phosphorylase, glycogen, muscle                                                             | Q9WUB3 | -0.271 | 3.4E-17 | 16.475 | Glycolysis/Glycogen degradation |
| PYGM            | succinate dehydrogenase complex, subunit A, flavoprotein (Fp)                               | Q8K2B3 | 0.101  | 9.2E-04 | 3.035  | Respiratory chain/TCA cycle     |
| SDHA            | succinate dehydrogenase complex, subunit B, iron sulfur (Ip)                                | A2AA77 | 0.135  | 6.4E-03 | 2.194  | Respiratory chain/TCA cycle     |
| SDHB            | solute carrier family 25 (mitochondrial carrier; oxoglutarate carrier), member 11           | Q5SX48 | 0.168  | 7.4E-03 | 2.134  |                                 |
| SLC25A11        | solute carrier family 25 (aspartate/glutamate carrier), member 12                           | Q8BH59 | 0.049  | 6.6E-03 | 2.180  |                                 |
| SLC25A12        | solute carrier family 25 (mitochondrial carrier; phosphate carrier), member 3               | Q8VEM8 | 0.100  | 7.3E-03 | 2.137  |                                 |
| SLC25A3         | solute carrier family 25 (mitochondrial carrier; adenine nucleotide translocator), member 4 | P48962 | 0.082  | 2.1E-03 | 2.686  |                                 |
| SLC25A4         | solute carrier family 27 (fatty acid transporter), member 1                                 | Q3TP13 | -0.800 | 2.7E-07 | 6.577  | FA uptake and transport         |
| SLC27A1 (FATP1) | superoxide dismutase 1, soluble                                                             | Q8C355 | -0.284 | 2.4E-10 | 9.614  |                                 |
| SOD1            | superoxide dismutase 2, mitochondrial                                                       | P09671 | 0.132  | 3.3E-02 | 1.487  |                                 |
| SOD2            | succinate-CoA ligase, ADP-forming, beta subunit                                             | Q3U6C7 | 0.079  | 7.7E-03 | 2.116  | Respiratory chain/TCA cycle     |
| SUCLA2          | triosephosphate isomerase 1                                                                 | P17751 | -0.152 | 4.4E-16 | 15.353 | Glycolysis/Glycogen degradation |
| TPI1            | ubiquinol-cytochrome c reductase core protein II                                            | Q9DB77 | 0.089  | 4.2E-04 | 3.382  | Respiratory chain/TCA cycle     |
| UQCRC2          |                                                                                             |        |        |         |        |                                 |

## SUPPLEMENTARY DATA

|         |                                                                                             |        |        |         |       |                             |
|---------|---------------------------------------------------------------------------------------------|--------|--------|---------|-------|-----------------------------|
| UQCRFS1 | ubiquinol-cytochrome c reductase, Rieske iron-sulfur polypeptide 1                          | Q9CR68 | 0.119  | 1.1E-03 | 2.951 | Respiratory chain/TCA cycle |
| VDAC2   | voltage-dependent anion channel 2                                                           | Q60930 | 0.072  | 2.0E-02 | 1.708 |                             |
| YWHAE   | tyrosine 3-monooxygenase/tryptophan 5-monooxygenase activation protein, epsilon polypeptide | A2ACM8 | -0.171 | 2.4E-04 | 3.627 |                             |
| YWHAZ   | tyrosine 3-monooxygenase/tryptophan 5-monooxygenase activation protein, zeta polypeptide    | Q8BWN0 | -0.229 | 2.0E-06 | 5.703 |                             |

SUPPLEMENTARY DATA

**Supplementary Table S2C.** Individual protein differential expression data from **Figure 2C volcano plot (STZ+I vs. ND comparison)** of 104 significantly affected proteins implicated in skeletal muscle energy metabolism. Table lists protein symbols, names and accession numbers as given by UniProt database, together with their expression ratio (in log2 scale), p-value (base and in  $-\log_{10}$  scale) and Ingenuity IPA protein group affiliation (Group). Proteins are listed in the alphabetical order by their respective symbols.

| Symbol | Entrez Gene Name                                                                                     | Accession # | Log2 (STZ+I vs ND) | p-value (STZ+I vs ND) | $-\log_{10}$ p-value (STZ+I vs ND) | Group                           |
|--------|------------------------------------------------------------------------------------------------------|-------------|--------------------|-----------------------|------------------------------------|---------------------------------|
| ACAA2  | acetyl-CoA acyltransferase 2                                                                         | Q8BWT1      | -0.523             | 1.1E-27               | 26.947                             | FA metabolism                   |
| ACADL  | acyl-CoA dehydrogenase, long chain                                                                   | P51174      | -0.510             | 3.7E-23               | 22.434                             | FA metabolism                   |
| ACADM  | acyl-CoA dehydrogenase, C-4 to C-12 straight chain                                                   | Q91WS8      | -0.454             | 1.3E-13               | 12.876                             | FA metabolism                   |
| ACADVL | acyl-CoA dehydrogenase, very long chain                                                              | P50544      | -0.301             | 4.4E-16               | 15.353                             | FA metabolism                   |
| ACO2   | aconitase 2, mitochondrial                                                                           | Q99K10      | 0.050              | 1.4E-04               | 3.842                              | Respiratory chain/TCA cycle     |
| ACSL1  | acyl-CoA synthetase long-chain family member 1                                                       | P41216      | -0.318             | 1.9E-42               | 41.728                             | FA metabolism                   |
| ALDH2  | aldehyde dehydrogenase 2 family (mitochondrial)                                                      | P47738      | -0.453             | 2.4E-13               | 12.629                             | FA metabolism                   |
| ALDOA  | aldolase A, fructose-bisphosphate                                                                    | Q5FWB7      | 0.100              | 2.8E-04               | 3.561                              | Glycolysis/Glycogen degradation |
| ATP5A1 | ATP synthase, H <sup>+</sup> transporting, mitochondrial F1 complex, alpha subunit 1, cardiac muscle | D3Z6F5      | -0.118             | 7.0E-05               | 4.154                              | Respiratory chain/TCA cycle     |
| ATP5B  | ATP synthase, H <sup>+</sup> transporting, mitochondrial F1 complex, beta polypeptide                | P56480      | -0.127             | 4.3E-07               | 6.368                              | Respiratory chain/TCA cycle     |
| ATP5C1 | ATP synthase, H <sup>+</sup> transporting, mitochondrial F1 complex, gamma polypeptide 1             | A2AKU9      | -0.144             | 2.4E-06               | 5.620                              | Respiratory chain/TCA cycle     |
| ATP5F1 | ATP synthase, H <sup>+</sup> transporting, mitochondrial Fo complex, subunit B1                      | Q510W0      | -0.200             | 2.5E-06               | 5.599                              | Respiratory chain/TCA cycle     |



## SUPPLEMENTARY DATA

|        |                                                                                |        |        |          |        |                             |
|--------|--------------------------------------------------------------------------------|--------|--------|----------|--------|-----------------------------|
| ATP5H  | ATP synthase, H <sup>+</sup> transporting, mitochondrial Fo complex, subunit d | Q9DCX2 | -0.250 | 4.0E-11  | 10.394 | Respiratory chain/TCA cycle |
| ATP5L  | ATP synthase, H <sup>+</sup> transporting, mitochondrial Fo complex, subunit G | Q9CPQ8 | -0.261 | 2.7E-05  | 4.565  | Respiratory chain/TCA cycle |
| ATP5O  | ATP synthase, H <sup>+</sup> transporting, mitochondrial F1 complex, O subunit | Q9DB20 | -0.161 | 9.0E-05  | 4.047  | Respiratory chain/TCA cycle |
| ECHS1  | enoyl CoA hydratase, short chain, 1, mitochondrial                             | Q8BH95 | -0,292 | 1,21E-02 | 1.918  | FA metabolism               |
| CD36   | CD36 molecule (thrombospondin receptor)                                        | Q08857 | -0.261 | 1.9E-03  | 2.728  | FA uptake and transport     |
| CHCHD3 | coiled-coil-helix-coiled-coil-helix domain containing 3                        | Q9D9P1 | -0.231 | 3.0E-02  | 1.524  | Mitochondrial protein       |
| CISD1  | CDGSH iron sulfur domain 1                                                     | Q91WS0 | -0.145 | 3.8E-03  | 2.426  | Mitochondrial protein       |
| COX1   | cytochrome c oxidase subunit I                                                 | Q9MD68 | -0.269 | 1.8E-04  | 3.757  | Respiratory chain/TCA cycle |
| COX2   | cytochrome c oxidase subunit II                                                | P00405 | -0.213 | 3.3E-04  | 3.479  | Respiratory chain/TCA cycle |
| COX4I1 | cytochrome c oxidase subunit IV isoform 1                                      | P19783 | -0.211 | 4.7E-03  | 2.328  | Respiratory chain/TCA cycle |
| COX5A  | cytochrome c oxidase subunit Va                                                | P12787 | -0.267 | 4.7E-03  | 2.330  | Respiratory chain/TCA cycle |
| COX5B  | cytochrome c oxidase subunit Vb                                                | P19536 | -0.256 | 4.4E-03  | 2.360  | Respiratory chain/TCA cycle |
| CPT1B  | carnitine palmitoyltransferase 1B (muscle)                                     | Q3UIM5 | -0.246 | 3.0E-12  | 11.520 | FA metabolism               |
| CPT2   | carnitine palmitoyltransferase 2                                               | P52825 | -0.324 | 3.8E-04  | 3.420  | FA metabolism               |
| CRAT   | carnitine O-acetyltransferase                                                  | P47934 | -0.253 | 1.1E-06  | 5.975  | Mitochondrial protein       |
| CS     | citrate synthase                                                               | Q9CZU6 | -0.123 | 2.2E-04  | 3.666  | Respiratory chain/TCA cycle |
| CYC1   | cytochrome c-1                                                                 | Q9D0M3 | -0.266 | 1.9E-03  | 2.726  | Respiratory chain/TCA cycle |

SUPPLEMENTARY DATA

|       |                                                                                   |        |        |         |        |                                 |
|-------|-----------------------------------------------------------------------------------|--------|--------|---------|--------|---------------------------------|
| CYCS  | cytochrome c, somatic                                                             | Q56A15 | -0.229 | 5.1E-06 | 5.291  | Respiratory chain/TCA cycle     |
| DECR1 | 2,4-dienoyl CoA reductase 1, mitochondrial                                        | Q9CQ62 | -0.327 | 3.1E-10 | 9.507  | Mitochondrial protein           |
| DLAT  | dihydrolipoamide S-acetyltransferase                                              | Q8BMF4 | -0.257 | 6.8E-20 | 19.170 | Glycolysis/Glycogen degradation |
| DLD   | dihydrolipoamide dehydrogenase                                                    | O08749 | -0.127 | 8.1E-06 | 5.092  | Respiratory chain/TCA cycle     |
| DLST  | dihydrolipoamide S-succinyltransferase (E2 component of 2-oxo-glutarate complex)  | Q9D2G2 | -0.295 | 2.8E-04 | 3.551  | Respiratory chain/TCA cycle     |
| ECI1  | enoyl-CoA delta isomerase 1                                                       | Q8QZV3 | -0.268 | 2.4E-08 | 7.625  | FA metabolism                   |
| ENO3  | enolase 3 (beta, muscle)                                                          | P21550 | -0.309 | 5.2E-25 | 24.287 | Glycolysis/Glycogen degradation |
| ETFA  | electron-transfer-flavoprotein, alpha polypeptide                                 | Q99LC5 | -0.272 | 6.4E-30 | 29.193 | Respiratory chain/TCA cycle     |
| ETFB  | electron-transfer-flavoprotein, beta polypeptide                                  | Q9DCW4 | -0.315 | 5.1E-18 | 17.296 | Respiratory chain/TCA cycle     |
| FABP3 | fatty acid binding protein 3, muscle and heart (mammary-derived growth inhibitor) | Q5EBJ0 | -0.398 | 1.5E-33 | 32.830 | FA uptake and transport         |
| FABP4 | fatty acid binding protein 4, adipocyte                                           | Q542H7 | -0.343 | 5.0E-18 | 17.298 | FA uptake and transport         |
| FH    | fumarate hydratase                                                                | Q3UIA9 | 0.097  | 2.3E-03 | 2.638  | Respiratory chain/TCA cycle     |
| GAPDH | glyceraldehyde-3-phosphate dehydrogenase                                          | P16858 | 0.073  | 2.2E-13 | 12.650 | Glycolysis/Glycogen degradation |
| GOT2  | glutamic-oxaloacetic transaminase 2, mitochondrial (aspartate aminotransferase 2) | P05202 | -0.251 | 9.7E-13 | 12.014 | FA uptake and transport         |
| GPD1  | glycerol-3-phosphate dehydrogenase 1 (soluble)                                    | P13707 | 0.094  | 3.8E-07 | 6.418  | Glycolysis/Glycogen degradation |
| GPD2  | glycerol-3-phosphate dehydrogenase 2                                              | Q64521 | 0.225  | 3.5E-07 | 6.462  | Glycolysis/Glycogen degradation |

SUPPLEMENTARY DATA

|          |                                                                                                                  |        |        |         |        |                                |
|----------|------------------------------------------------------------------------------------------------------------------|--------|--------|---------|--------|--------------------------------|
|          | (mitochondrial)                                                                                                  |        |        |         |        |                                |
| HADH     | hydroxyacyl-CoA dehydrogenase                                                                                    | Q61425 | -0.361 | 2.4E-06 | 5.616  | FA metabolism                  |
| HADHA    | hydroxyacyl-CoA dehydrogenase/3-ketoacyl-CoA thiolase/enoyl-CoA hydratase (trifunctional protein), alpha subunit | Q8BMS1 | -0.255 | 6.9E-25 | 24.164 | FA metabolism                  |
| HADHB    | hydroxyacyl-CoA dehydrogenase/3-ketoacyl-CoA thiolase/enoyl-CoA hydratase (trifunctional protein), beta subunit  | Q99JY0 | -0.235 | 8.5E-27 | 26.071 | FA metabolism                  |
| HIBADH   | 3-hydroxyisobutyrate dehydrogenase                                                                               | Q99L13 | -0.445 | 9.2E-04 | 3.035  | Mitochondrial protein          |
| HSD17B10 | hydroxysteroid (17-beta) dehydrogenase 10                                                                        | Q99N15 | -0.137 | 3.1E-02 | 1.504  | FA metabolism                  |
| HSPA9    | heat shock 70kDa protein 9 (mortalin)                                                                            | P38647 | -0.265 | 8.5E-10 | 9.072  | Mitochondrial protein          |
| HSPD1    | heat shock 60kDa protein 1 (chaperonin)                                                                          | P63038 | -0.216 | 5.1E-13 | 12.292 | Mitochondrial protein          |
| HSPE1    | heat shock 10kDa protein 1 (chaperonin 10)                                                                       | Q64433 | -0.238 | 4.1E-02 | 1.389  | Mitochondrial protein          |
| IDH2     | isocitrate dehydrogenase 2 (NADP+), mitochondrial                                                                | P54071 | -0.242 | 2.9E-13 | 12.541 | Respiratory chain/TCA cycle    |
| IDH3A    | isocitrate dehydrogenase 3 (NAD+) alpha                                                                          | Q9D6R2 | -0.181 | 7.4E-09 | 8.131  | Respiratory chain/TCA cycle    |
| IDH3B    | isocitrate dehydrogenase 3 (NAD+) beta                                                                           | Q91VA7 | -0.212 | 1.7E-11 | 10.762 | Respiratory chain/TCA cycle    |
| IDH3G    | isocitrate dehydrogenase 3 (NAD+) gamma                                                                          | P70404 | -0.235 | 1.1E-03 | 2.975  | Respiratory chain/TCA cycle    |
| LETM1    | leucine zipper-EF-hand containing transmembrane protein 1                                                        | Q9Z2I0 | -0.402 | 1.3E-03 | 2.893  | Mitochondrial solute transport |
| LRPPRC   | leucine-rich pentatricopeptide repeat containing                                                                 | Q99KF9 | -0.439 | 3.4E-02 | 1.471  | Mitochondrial protein          |

SUPPLEMENTARY DATA

|      |                                              |        |        |         |        |                                 |
|------|----------------------------------------------|--------|--------|---------|--------|---------------------------------|
| MDH2 | malate dehydrogenase 2, NAD (mitochondrial)  | P08249 | -0.152 | 5.0E-11 | 10.303 | Respiratory chain/TCA cycle     |
| ME1  | malic enzyme 1, NADP(+)-dependent, cytosolic | Q9DBF9 | -0.347 | 3.9E-07 | 6.405  | Glycolysis/Glycogen degradation |

**Supplementary Table S2D.** Individual differential expression from **Figure 2D (STZ-I vs. ND comparison)** of 60 significantly affected proteins implicated in protein synthesis, protein degradation and oxidative stress response. Table lists protein symbols, names and accession numbers as given by UniProt database database, together with their expression ratio (in log2 scale), p-value (base and in  $-\log_{10}$  scale) and Ingenuity IPA protein group affiliation (Group). Proteins are listed in the alphabetical order by their respective symbols.

| Symbol | Entrez Gene Name                                                                       | Accession # | Log2 (STZ-I vs ND) | p-value (STZ-I vs ND) | $-\log_{10}$ p-value (STZ-I vs ND) | Group                                |
|--------|----------------------------------------------------------------------------------------|-------------|--------------------|-----------------------|------------------------------------|--------------------------------------|
| ACTA1  | actin, alpha 1, skeletal muscle                                                        | P68134      | 0.241              | 1.8E-06               | 5.740                              | Oxidative stress and cellular damage |
| CAT    | catalase                                                                               | P24270      | 1.398              | 1.5E-09               | 8.818                              | Oxidative stress and cellular damage |
| CRYAB  | crystallin, alpha B                                                                    | Q52L78      | -0.561             | 8.9E-13               | 12.053                             | Protein synthesis and chaperones     |
| DARS   | aspartyl-tRNA synthetase                                                               | Q3TF87      | -0.419             | 3.9E-06               | 5.408                              | Protein synthesis and chaperones     |
| EEF1D  | eukaryotic translation elongation factor 1 delta (guanine nucleotide exchange protein) | P57776      | -0.514             | 2.3E-02               | 1.638                              | Protein synthesis and chaperones     |
| EEF1G  | eukaryotic translation elongation factor 1 gamma                                       | Q4FZK2      | -0.651             | 2.6E-14               | 13.578                             | Protein synthesis and chaperones     |
| EPRS   | glutamyl-prolyl-tRNA synthetase                                                        | Q8CGC7      | -0.363             | 3.6E-05               | 4.445                              | Protein synthesis and chaperones     |
| FTH1   | ferritin, heavy polypeptide 1                                                          | P09528      | 0.567              | 1.5E-04               | 3.812                              | Oxidative stress and cellular damage |
| GSTM1  | glutathione S-transferase mu 1                                                         | P15626      | 0.521              | 4.7E-05               | 4.327                              | Oxidative stress and cellular damage |
| GSTM4  | glutathione S-transferase mu 4                                                         | Q8R5I6      | 0.415              | 1.0E-03               | 2.983                              | Oxidative stress and cellular damage |

SUPPLEMENTARY DATA

|          |                                                              |        |        |         |        |                                      |
|----------|--------------------------------------------------------------|--------|--------|---------|--------|--------------------------------------|
| GSTM5    | glutathione S-transferase mu 5                               | P10649 | 0.303  | 3.2E-07 | 6.495  | Oxidative stress and cellular damage |
| GSTP1    | glutathione S-transferase pi 1                               | P19157 | 0.269  | 4.0E-06 | 5.399  | Oxidative stress and cellular damage |
| HSP90AB1 | heat shock protein 90kDa alpha (cytosolic), class B member 1 | Q71LX8 | -0.291 | 1.4E-13 | 12.854 | Protein synthesis and chaperones     |
| HSP90AB1 | heat shock protein 90kDa alpha (cytosolic), class B member 1 | Q71LX8 | -0.291 | 1.4E-13 | 12.854 | Oxidative stress and cellular damage |
| HSP90B1  | heat shock protein 90kDa beta (Grp94), member 1              | P08113 | -0.267 | 5.7E-02 | 1.243  | Protein synthesis and chaperones     |
| HSPA4    | heat shock 70kDa protein 4                                   | Q61316 | -0.182 | 6.5E-02 | 1.185  | Protein synthesis and chaperones     |
| HSPA9    | heat shock 70kDa protein 9 (mortalin)                        | P38647 | -0.423 | 9.3E-20 | 19.030 | Protein synthesis and chaperones     |
| HSPB1    | heat shock 27kDa protein 1                                   | P14602 | -0.514 | 9.1E-13 | 12.042 | Protein synthesis and chaperones     |
| HSPB6    | heat shock protein, alpha-crystallin-related, B6             | Q5EBG6 | -0.827 | 3.0E-12 | 11.519 | Protein synthesis and chaperones     |
| HSPD1    | heat shock 60kDa protein 1 (chaperonin)                      | P63038 | -0.248 | 3.1E-18 | 17.509 | Protein synthesis and chaperones     |
| HSPE1    | heat shock 10kDa protein 1 (chaperonin 10)                   | Q4KL76 | -0.348 | 7.8E-04 | 3.107  | Protein synthesis and chaperones     |
| MAP2K6   | mitogen-activated protein kinase kinase 6                    | P70236 | -0.322 | 7.3E-03 | 2.140  | Oxidative stress and cellular damage |
| PPP1CB   | protein phosphatase 1, catalytic subunit, beta isozyme       | P62141 | -0.191 | 1.4E-02 | 1.860  | Protein synthesis and chaperones     |
| PRDX1    | peroxiredoxin 1                                              | P35700 | 0.136  | 8.5E-03 | 2.072  | Oxidative stress and cellular damage |
| PRDX2    | peroxiredoxin 2                                              | Q61171 | 0.085  | 8.6E-03 | 2.066  | Oxidative stress and cellular damage |
| PRDX5    | peroxiredoxin 5                                              | P99029 | -0.299 | 4.8E-08 | 7.315  | Oxidative stress and cellular damage |
| PSMA5    | proteasome (prosome, macropain) subunit, alpha type, 5       | Q9Z2U1 | 0.342  | 1.1E-06 | 5.979  | Protein ubiquitination-related       |
| RPL10A   | ribosomal protein L10a                                       | P53026 | -0.694 | 1.9E-05 | 4.721  | Protein synthesis and                |

SUPPLEMENTARY DATA

|        |                                  |        |        |         |       |                                  |
|--------|----------------------------------|--------|--------|---------|-------|----------------------------------|
|        |                                  |        |        |         |       | chaperones                       |
| RPL11  | ribosomal protein L11            | A2BH07 | -0.643 | 1.0E-05 | 4.983 | Protein synthesis and chaperones |
| RPL12  | ribosomal protein L12            | Q5BLK0 | -0.573 | 1.2E-03 | 2.939 | Protein synthesis and chaperones |
| RPL13  | ribosomal protein L13            | P47963 | 0.57   | 1.4E-02 | 1.866 | Protein synthesis and chaperones |
| RPL23  | ribosomal protein L23            | P62830 | -0.382 | 9.8E-03 | 2.009 | Protein synthesis and chaperones |
| RPL35A | ribosomal protein L35a           | O55142 | -0.701 | 3.4E-03 | 2.469 | Protein synthesis and chaperones |
| RPL9   | ribosomal protein L9             | P51410 | -0.719 | 5.5E-04 | 3.256 | Protein synthesis and chaperones |
| RPLP0  | ribosomal protein, large, P0     | Q5M8R8 | -0.674 | 5.8E-10 | 9.240 | Protein synthesis and chaperones |
| RPLP2  | ribosomal protein, large, P2     | P99027 | -0.234 | 1.3E-03 | 2.900 | Protein synthesis and chaperones |
| RPS10  | ribosomal protein S10            | Q3U9P0 | -0.492 | 3.5E-02 | 1.456 | Protein synthesis and chaperones |
| RPS11  | ribosomal protein S11            | Q3UC02 | -0.461 | 2.2E-02 | 1.652 | Protein synthesis and chaperones |
| RPS18  | ribosomal protein S18            | P62270 | -0.328 | 1.1E-02 | 1.951 | Protein synthesis and chaperones |
| RPS19  | ribosomal protein S19            | Q9CZX8 | -0.514 | 9.9E-04 | 3.007 | Protein synthesis and chaperones |
| RPS2   | ribosomal protein S2             | P25444 | -0.583 | 5.3E-04 | 3.276 | Protein synthesis and chaperones |
| RPS3   | ribosomal protein S3             | Q5YLW3 | -0.544 | 3.8E-04 | 3.425 | Protein synthesis and chaperones |
| RPS4Y1 | ribosomal protein S4, Y-linked 1 | P62702 | -0.607 | 5.3E-03 | 2.278 | Protein synthesis and chaperones |
| RPS7   | ribosomal protein S7             | P62082 | -0.197 | 2.9E-02 | 1.538 | Protein synthesis and chaperones |
| RPSA   | ribosomal protein SA             | B2CY77 | -0.605 | 1.7E-05 | 4.783 | Protein synthesis and chaperones |

SUPPLEMENTARY DATA

|        |                                                                                             |              |        |         |        |                                      |
|--------|---------------------------------------------------------------------------------------------|--------------|--------|---------|--------|--------------------------------------|
| SOD1   | superoxide dismutase 1, soluble                                                             | P08228       | 0.213  | 9.2E-07 | 6.038  | Oxidative stress and cellular damage |
| SOD2   | superoxide dismutase 2, mitochondrial                                                       | P09671       | -0.305 | 8.3E-07 | 6.081  | Oxidative stress and cellular damage |
| STIP1  | stress-induced-phosphoprotein 1                                                             | Q60864       | -0.186 | 5.2E-03 | 2.287  | Oxidative stress and cellular damage |
| TARSL2 | threonyl-tRNA synthetase-like 2                                                             | Q8BLY2       | -0.415 | 3.7E-06 | 5.437  | Protein synthesis and chaperones     |
| TPT1   | tumor protein, translationally-controlled 1                                                 | P63028       | -0.188 | 8.3E-03 | 2.079  | Protein synthesis and chaperones     |
| TUFM   | Tu translation elongation factor, mitochondrial                                             | Q8BFR5       | -0.179 | 1.6E-05 | 4.801  | Protein synthesis and chaperones     |
| UBA1   | ubiquitin-like modifier activating enzyme 1                                                 | Q02053       | 0.16   | 5.4E-03 | 2.265  | Protein ubiquitination-related       |
| UBC    | ubiquitin C                                                                                 | A5JUZ1       | 0.351  | 1.3E-15 | 14.876 | Protein ubiquitination-related       |
| UBE2L3 | ubiquitin-conjugating enzyme E2L3                                                           | P68037       | 0.16   | 3.9E-02 | 1.415  | Protein ubiquitination-related       |
| USP35  | ubiquitin specific peptidase 35                                                             | NP_001170883 | 0.721  | 2.8E-03 | 2.548  | Protein ubiquitination-related       |
| YWHAB  | tyrosine 3-monooxygenase/tryptophan 5-monooxygenase activation protein, beta polypeptide    | Q9CQV8       | 0.514  | 1.3E-03 | 2.873  | Oxidative stress and cellular damage |
| YWHAE  | tyrosine 3-monooxygenase/tryptophan 5-monooxygenase activation protein, epsilon polypeptide | Q5SS40       | 0.132  | 2.9E-04 | 3.533  | Oxidative stress and cellular damage |
| YWHAG  | tyrosine 3-monooxygenase/tryptophan 5-monooxygenase activation protein, gamma polypeptide   | A8IP69       | 0.136  | 7.2E-06 | 5.143  | Oxidative stress and cellular damage |
| YWHAZ  | tyrosine 3-monooxygenase/tryptophan 5-monooxygenase activation protein, zeta polypeptide    | P63101       | 0.139  | 4.3E-03 | 2.366  | Oxidative stress and cellular damage |

SUPPLEMENTARY DATA

**Supplementary Table S2E.** Individual differential expression from **Figure 2E (STZ+I vs. STZ-I comparison)** of 60 significantly affected proteins implicated in protein synthesis, protein degradation and oxidative stress response. Table lists protein symbols, names and accession numbers as given by UniProt database, together with their expression ratio (in log<sub>2</sub> scale), p-value (base and in  $-\log_{10}$  scale) and Ingenuity IPA protein group affiliation (Group). Proteins are listed in the alphabetical order by their respective symbols.

| Symbol   | Entrez Gene Name                                                                       | Accession # | Log <sub>2</sub><br>(STZ+I vs<br>STZ-I) | p-value<br>(STZ+I vs<br>STZ-I) | $-\log_{10}$<br>p-value<br>(STZ+I vs<br>STZ-I) | Group                                |
|----------|----------------------------------------------------------------------------------------|-------------|-----------------------------------------|--------------------------------|------------------------------------------------|--------------------------------------|
| ACTA1    | actin, alpha 1, skeletal muscle                                                        | P68134      | 0.212                                   | 3.8E-05                        | 4.419                                          | Oxidative stress and cellular damage |
| CAT      | catalase                                                                               | P24270      | -1.341                                  | 8.7E-09                        | 8.062                                          | Oxidative stress and cellular damage |
| DARS     | aspartyl-tRNA synthetase                                                               | Q3TF87      | 0.733                                   | 3.6E-05                        | 4.445                                          | Protein synthesis and chaperones     |
| EEF1A2   | eukaryotic translation elongation factor 1 alpha 2                                     | P62631      | 0.049                                   | 3.2E-02                        | 1.498                                          | Protein synthesis and chaperones     |
| EEF1D    | eukaryotic translation elongation factor 1 delta (guanine nucleotide exchange protein) | P57776      | 0.541                                   | 2.5E-02                        | 1.609                                          | Protein synthesis and chaperones     |
| EEF1G    | eukaryotic translation elongation factor 1 gamma                                       | Q4FZK2      | 0.584                                   | 4.5E-09                        | 8.344                                          | Protein synthesis and chaperones     |
| Eif5a    | eukaryotic translation initiation factor 5A                                            | P63242      | -0.138                                  | 1.7E-02                        | 1.780                                          | Protein synthesis and chaperones     |
| EPRS     | glutamyl-prolyl-tRNA synthetase                                                        | Q8CGC7      | 0.262                                   | 1.3E-03                        | 2.900                                          | Protein synthesis and chaperones     |
| FTH1     | ferritin, heavy polypeptide 1                                                          | P09528      | -0.702                                  | 1.0E-09                        | 9.002                                          | Oxidative stress and cellular damage |
| GARS     | glycyl-tRNA synthetase                                                                 | Q9CZD3      | -0.182                                  | 4.0E-02                        | 1.397                                          | Protein synthesis and chaperones     |
| GPX3     | glutathione peroxidase 3 (plasma)                                                      | P46412      | -0.586                                  | 1.2E-02                        | 1.939                                          | Oxidative stress and cellular damage |
| GSTM1    | glutathione S-transferase mu 1                                                         | P15626      | -0.250                                  | 4.0E-02                        | 1.398                                          | Oxidative stress and cellular damage |
| GSTM4    | glutathione S-transferase mu 4                                                         | Q8R5I6      | -0.244                                  | 2.7E-02                        | 1.565                                          | Oxidative stress and cellular damage |
| GSTM5    | glutathione S-transferase mu 5                                                         | P10649      | -0.255                                  | 1.9E-03                        | 2.730                                          | Oxidative stress and cellular damage |
| GSTP1    | glutathione S-transferase pi 1                                                         | P19157      | -0.274                                  | 2.8E-06                        | 5.550                                          | Oxidative stress and cellular damage |
| HSP90AB1 | heat shock protein 90kDa alpha (cytosolic), class B member 1                           | Q71LX8      | 0.257                                   | 3.9E-13                        | 12.411                                         | Oxidative stress and cellular damage |
| HSP90AB1 | heat shock protein 90kDa alpha (cytosolic), class B member 1                           | Q71LX8      | 0.257                                   | 3.9E-13                        | 12.411                                         | Protein synthesis and chaperones     |
| HSPA9    | heat shock 70kDa protein 9 (mortalin)                                                  | P38647      | 0.158                                   | 3.1E-04                        | 3.506                                          | Protein synthesis and chaperones     |



SUPPLEMENTARY DATA

|         |                                                         |        |        |         |        |                                      |
|---------|---------------------------------------------------------|--------|--------|---------|--------|--------------------------------------|
| HSPB1   | heat shock 27kDa protein 1                              | P14602 | 0.244  | 4.2E-04 | 3.375  | Protein synthesis and chaperones     |
| HSPB6   | heat shock protein, alpha-crystallin-related, B6        | Q5EBG6 | 0.600  | 6.0E-05 | 4.223  | Protein synthesis and chaperones     |
| HSPD1   | heat shock 60kDa protein 1 (chaperonin)                 | P63038 | 0.063  | 4.7E-02 | 1.332  | Protein synthesis and chaperones     |
| ME1     | malic enzyme 1, NADP(+)-dependent, cytosolic            | Q921S3 | -0.221 | 2.3E-05 | 4.648  | Oxidative stress and cellular damage |
| PPP1CA  | protein phosphatase 1, catalytic subunit, alpha isozyme | P62137 | 0.189  | 4.6E-02 | 1.334  | Protein synthesis and chaperones     |
| PPP2R2A | protein phosphatase 2, regulatory subunit B, alpha      | Q6P1F6 | -0.172 | 2.9E-03 | 2.539  | Protein synthesis and chaperones     |
| PRDX1   | peroxiredoxin 1                                         | B1AXW5 | -0.211 | 1.6E-09 | 8.796  | Oxidative stress and cellular damage |
| PRDX2   | peroxiredoxin 2                                         | Q61171 | -0.152 | 4.2E-06 | 5.375  | Oxidative stress and cellular damage |
| PSMA5   | proteasome (prosome, macropain) subunit, alpha type, 5  | Q9Z2U1 | -0.215 | 2.7E-03 | 2.573  | Protein ubiquitination-related       |
| PSMC4   | proteasome (prosome, macropain) 26S subunit, ATPase, 4  | Q3TFA5 | -0.204 | 1.5E-02 | 1.821  | Protein ubiquitination-related       |
| RPL10A  | ribosomal protein L10a                                  | P53026 | 0.693  | 1.2E-04 | 3.936  | Protein synthesis and chaperones     |
| RPL11   | ribosomal protein L11                                   | A2BH07 | 0.626  | 1.7E-07 | 6.770  | Protein synthesis and chaperones     |
| RPL12   | ribosomal protein L12                                   | Q5BLK0 | 0.628  | 7.7E-05 | 4.114  | Protein synthesis and chaperones     |
| RPL22   | ribosomal protein L22                                   | P67984 | 0.544  | 4.9E-02 | 1.308  | Protein synthesis and chaperones     |
| RPL23   | ribosomal protein L23                                   | P62830 | 0.505  | 7.9E-04 | 3.101  | Protein synthesis and chaperones     |
| RPL27   | ribosomal protein L27                                   | P61358 | 0.800  | 3.5E-02 | 1.460  | Protein synthesis and chaperones     |
| RPL35A  | ribosomal protein L35a                                  | O55142 | 0.665  | 1.3E-03 | 2.893  | Protein synthesis and chaperones     |
| RPL9    | ribosomal protein L9                                    | P51410 | 0.813  | 1.2E-05 | 4.932  | Protein synthesis and chaperones     |
| RPLP0   | ribosomal protein, large, P0                            | Q5M8R8 | 0.710  | 3.4E-11 | 10.466 | Protein synthesis and chaperones     |
| RPLP2   | ribosomal protein, large, P2                            | P99027 | 0.240  | 1.8E-03 | 2.757  | Protein synthesis and chaperones     |
| RPS10   | ribosomal protein S10                                   | Q3U9P0 | 0.575  | 9.4E-03 | 2.027  | Protein synthesis and chaperones     |
| RPS11   | ribosomal protein S11                                   | Q3UC02 | 0.723  | 8.0E-04 | 3.096  | Protein synthesis and chaperones     |
| RPS13   | ribosomal protein S13                                   | Q5BLJ7 | 0.592  | 1.9E-02 | 1.726  | Protein synthesis and chaperones     |
| RPS15A  | ribosomal protein S15a                                  | P62245 | 0.505  | 1.3E-02 | 1.886  | Protein synthesis and chaperones     |
| RPS16   | ribosomal protein S16                                   | A4FUS1 | 0.659  | 2.1E-02 | 1.678  | Protein synthesis and chaperones     |
| RPS18   | ribosomal protein S18                                   | P62270 | 0.318  | 2.2E-02 | 1.650  | Protein synthesis and chaperones     |

## SUPPLEMENTARY DATA

|        |                                                                                             |        |        |         |        |                                      |
|--------|---------------------------------------------------------------------------------------------|--------|--------|---------|--------|--------------------------------------|
| RPS19  | ribosomal protein S19                                                                       | Q9CZX8 | 0.571  | 1.4E-04 | 3.851  | Protein synthesis and chaperones     |
| RPS2   | ribosomal protein S2                                                                        | P25444 | 0.331  | 2.7E-02 | 1.565  | Protein synthesis and chaperones     |
| RPS3   | ribosomal protein S3                                                                        | Q5YLW3 | 0.800  | 2.6E-08 | 7.588  | Protein synthesis and chaperones     |
| RPS4Y1 | ribosomal protein S4, Y-linked 1                                                            | P62702 | 0.963  | 4.4E-05 | 4.354  | Protein synthesis and chaperones     |
| RPSA   | ribosomal protein SA                                                                        | B2CY77 | 0.656  | 9.7E-06 | 5.015  | Protein synthesis and chaperones     |
| SOD1   | superoxide dismutase 1, soluble                                                             | P08228 | -0.284 | 2.4E-10 | 9.614  | Oxidative stress and cellular damage |
| SOD2   | superoxide dismutase 2, mitochondrial                                                       | P09671 | 0.132  | 3.3E-02 | 1.487  | Oxidative stress and cellular damage |
| TARSL2 | threonyl-tRNA synthetase-like 2                                                             | Q8BLY2 | 0.247  | 2.8E-03 | 2.554  | Protein synthesis and chaperones     |
| TKT    | transketolase                                                                               | P40142 | -0.280 | 4.1E-02 | 1.393  | Oxidative stress and cellular damage |
| UBA1   | ubiquitin-like modifier activating enzyme 1                                                 | Q02053 | -0.115 | 2.9E-02 | 1.538  | Protein ubiquitination-related       |
| UBC    | ubiquitin C                                                                                 | A5JUZ1 | -0.244 | 1.1E-06 | 5.947  | Protein ubiquitination-related       |
| VCP    | valosin containing protein                                                                  | Q01853 | -0.123 | 1.4E-08 | 7.860  | Oxidative stress and cellular damage |
| YWHAB  | tyrosine 3-monooxygenase/tryptophan 5-monooxygenase activation protein, beta polypeptide    | Q9CQV8 | -0.439 | 4.2E-03 | 2.378  | Oxidative stress and cellular damage |
| YWHAE  | tyrosine 3-monooxygenase/tryptophan 5-monooxygenase activation protein, epsilon polypeptide | Q5SS40 | -0.171 | 2.4E-04 | 3.627  | Oxidative stress and cellular damage |
| YWHAG  | tyrosine 3-monooxygenase/tryptophan 5-monooxygenase activation protein, gamma polypeptide   | A8IP69 | -0.174 | 4.9E-11 | 10.310 | Oxidative stress and cellular damage |
| YWHAZ  | tyrosine 3-monooxygenase/tryptophan 5-monooxygenase activation protein, zeta polypeptide    | P63101 | -0.229 | 2.0E-06 | 5.703  | Oxidative stress and cellular damage |

SUPPLEMENTARY DATA

**Supplementary Table S2F.** Individual differential expression from **Figure S2F (STZ+I vs. ND comparison)** of 32 significantly affected proteins implicated in protein synthesis, protein degradation and oxidative stress response. Table lists protein symbols, names and accession numbers as given by UniProt database, together with their expression ratio (in log2 scale), p-value (base and in  $-\log_{10}$  scale) and Ingenuity IPA protein group affiliation (Group). Proteins are listed in the alphabetical order by their respective symbols.

| Symbol   | Entrez Gene Name                                             | Accession # | Log2 (STZ+I vs ND) | p-value (STZ+I vs ND) | $-\log_{10}$ p-value (STZ+I vs ND) | Group                                |
|----------|--------------------------------------------------------------|-------------|--------------------|-----------------------|------------------------------------|--------------------------------------|
| ACTA1    | actin, alpha 1, skeletal muscle                              | P68134      | 0.452              | 2.8E-30               | 29.558                             | Oxidative stress and cellular damage |
| ACTC1    | actin, alpha, cardiac muscle 1                               | Q3UIJ3      | 0.558              | 7.5E-06               | 5.126                              | Oxidative stress and cellular damage |
| CRYAB    | crystallin, alpha B                                          | Q52L78      | -0.312             | 4.5E-12               | 11.343                             | Protein ubiquitination-related       |
| DNAJA2   | DnaJ (Hsp40) homolog, subfamily A, member 2                  | Q9QYJ0      | -0.230             | 3.4E-02               | 1.472                              | Oxidative stress and cellular damage |
| EEF1G    | eukaryotic translation elongation factor 1 gamma             | Q4FZK2      | -0.146             | 1.4E-02               | 1.863                              | Protein synthesis and chaperones     |
| FTH1     | ferritin, heavy polypeptide 1                                | P09528      | -0.290             | 1.7E-02               | 1.764                              | Oxidative stress and cellular damage |
| GARS     | glycyl-tRNA synthetase                                       | Q9CZD3      | -0.203             | 5.6E-03               | 2.251                              | Protein synthesis and chaperones     |
| GSTM1    | glutathione S-transferase mu 1                               | P15626      | 0.270              | 4.0E-02               | 1.394                              | Oxidative stress and cellular damage |
| GSTM5    | glutathione S-transferase mu 5                               | P10649      | 0.149              | 1.2E-02               | 1.907                              | Oxidative stress and cellular damage |
| HSP90AB1 | heat shock protein 90kDa alpha (cytosolic), class B member 1 | Q71LX8      | -0.110             | 4.1E-04               | 3.389                              | Protein synthesis and chaperones     |
| HSPA4    | heat shock 70kDa protein 4                                   | Q61316      | -0.254             | 1.3E-02               | 1.876                              | Protein synthesis and chaperones     |
| HSPA9    | heat shock 70kDa protein 9 (mortalin)                        | P38647      | -0.265             | 8.5E-10               | 9.072                              | Protein synthesis and chaperones     |
| HSPB1    | heat shock 27kDa protein 1                                   | P14602      | -0.270             | 4.5E-04               | 3.346                              | Protein synthesis and chaperones     |

SUPPLEMENTARY DATA

|        |                                                        |        |        |         |        |                                      |
|--------|--------------------------------------------------------|--------|--------|---------|--------|--------------------------------------|
| HSPD1  | heat shock 60kDa protein 1 (chaperonin)                | P63038 | -0.216 | 5.1E-13 | 12.292 | Protein synthesis and chaperones     |
| HSPE1  | heat shock 10kDa protein 1 (chaperonin 10)             | Q4KL76 | -0.238 | 4.1E-02 | 1.389  | Protein synthesis and chaperones     |
| ME1    | malic enzyme 1, NADP(+)-dependent, cytosolic           | Q9DBF9 | -0.347 | 3.9E-07 | 6.405  | Oxidative stress and cellular damage |
| MGST3  | microsomal glutathione S-transferase 3                 | Q9CPU4 | -0.313 | 1.8E-02 | 1.757  | Oxidative stress and cellular damage |
| PRDX1  | peroxiredoxin 1                                        | P35700 | -0.150 | 6.5E-06 | 5.190  | Oxidative stress and cellular damage |
| PRDX2  | peroxiredoxin 2                                        | Q61171 | -0.104 | 5.8E-03 | 2.237  | Oxidative stress and cellular damage |
| PRDX3  | peroxiredoxin 3                                        | P20108 | -0.127 | 4.6E-02 | 1.341  | Oxidative stress and cellular damage |
| PRDX5  | peroxiredoxin 5                                        | P99029 | -0.258 | 5.1E-06 | 5.292  | Oxidative stress and cellular damage |
| PSMA5  | proteasome (prosome, macropain) subunit, alpha type, 5 | Q9Z2U1 | -0.160 | 2.4E-02 | 1.625  | Protein ubiquitination-related       |
| PSMB3  | proteasome (prosome, macropain) subunit, beta type, 3  | Q545G0 | -0.296 | 4.6E-03 | 2.338  | Protein ubiquitination-related       |
| SOD1   | superoxide dismutase 1, soluble                        | P08228 | -0.118 | 2.0E-02 | 1.701  | Oxidative stress and cellular damage |
| SOD2   | superoxide dismutase 2, mitochondrial                  | P09671 | -0.173 | 6.3E-04 | 3.199  | Oxidative stress and cellular damage |
| STIP1  | stress-induced phosphoprotein 1                        | Q60864 | -0.184 | 1.7E-02 | 1.764  | Oxidative stress and cellular damage |
| TARSL2 | threonyl-tRNA synthetase-like 2                        | Q8BLY2 | -0.167 | 4.6E-02 | 1.335  | Protein synthesis and chaperones     |
| TUFM   | Tu translation elongation factor, mitochondrial        | Q8BFR5 | 0.107  | 7.9E-03 | 2.104  | Protein synthesis and chaperones     |
| UBC    | ubiquitin C                                            | A5JUZ1 | 0.107  | 1.5E-02 | 1.824  | Protein ubiquitination-related       |
| VCP    | valosin containing protein                             | Q01853 | -0.140 | 2.0E-09 | 8.706  | Oxidative stress and                 |

SUPPLEMENTARY DATA

|       |                                                                                           |        |        |         |       |                                      |
|-------|-------------------------------------------------------------------------------------------|--------|--------|---------|-------|--------------------------------------|
|       |                                                                                           |        |        |         |       | cellular damage                      |
| YWHAG | tyrosine 3-monooxygenase/tryptophan 5-monooxygenase activation protein, gamma polypeptide | A8IP69 | -0.095 | 4.1E-02 | 1.383 | Oxidative stress and cellular damage |
| YWHAZ | tyrosine 3-monooxygenase/tryptophan 5-monooxygenase activation protein, zeta polypeptide  | P63101 | -0.146 | 7.9E-03 | 2.102 | Oxidative stress and cellular damage |

**Supplementary Table S3A.** Canonical pathways significantly affected by insulin deprivation (STZ-I vs. ND comparison). Table lists pathway names as given by Ingenuity Pathway Analysis software, pathway p-value (score, as  $-\log_{10}$  p-value derivative) and significantly affected molecular members of a given pathway.

| Pathway Name                            | Score | Significantly affected proteins                                                                                                                                                                                                                                                                                          |
|-----------------------------------------|-------|--------------------------------------------------------------------------------------------------------------------------------------------------------------------------------------------------------------------------------------------------------------------------------------------------------------------------|
| Mitochondrial Dysfunction               | 36    | HSD17B10,SDHB,NDUFA9,NDUFA10,PRDX5,CPT1B,NDUFB5,NDUFB4,COX2,NDUFA2,PDH A1,NDUFA5,NDUFS1,SOD2,PARK7,GPD2,NDUFS6,UQCRFS1,NDUFS2,OGDH,COX411,NDU FS4,AIFM1,NDUFA8,SDHA,COX1,NDUFV1,NDUFB3,CYCS,ATP5A1,COX6C,NDUFS3,NDUFA 13,ATP5C1,NDUFS5,ND5,NDUFV2,ATP5B,NDUFA6,CAT,UQCRC2,NDUFB7,COX5A,NDUFA 12,CYC1,UQCRC1,COX5B,NDUFA7 |
| TCA Cycle II (Eukaryotic)               | 17,6  | SDHA,SDHB,IDH3G,ACO2,SUCLA2,CS,SUCLG1,DLST,DLD,IDH3A,FH,MDH2,OGDH,IDH3B                                                                                                                                                                                                                                                  |
| Glycolysis I                            | 8,44  | Pkm,PGK1,GPI,TPI1,ENO3,PGAM2,ALDOA,PFKM,FBP2                                                                                                                                                                                                                                                                             |
| Calcium Signaling                       | 8,29  | MYH4,TNNT1,MYL2,TNNI2,TNNC2,MYH8,TNNC1,ATP2A1,TPM3,TPM2,Tpm1,MYH7,ATP2 A2,MYL1,MYH2,TNNT3,CASQ1,MYL4,RYR1,ACTC1,ACTA1,MYH1                                                                                                                                                                                               |
| Fatty Acid $\beta$ -oxidation I         | 7,01  | HSD17B10,HADHB,SLC27A1,ACADM,ACAA2,ECI1,ACSL1,HADHA,HADH                                                                                                                                                                                                                                                                 |
| Glycolysis II                           | 5,68  | PGK1,GPI,ENO3,PGAM2,ALDOA,MDH2,FBP2                                                                                                                                                                                                                                                                                      |
| Actin Cytoskeleton Signaling            | 5,11  | MYH4,PFN1,MYL2,MYH8,MYLPF,ACTN2,MYLK2,PPP1CB,MYH7,GSN,TTN,MYL1,MYH2,CFL 2,MYL4,ACTC1,ACTA1,ACTN3,MYH1                                                                                                                                                                                                                    |
| Cellular Effects of Sildenafil (Viagra) | 4,88  | MYH4,MYH2,MYL2,MYH8,MYLPF,MYL4,PPP1CB,MYH7,ACTC1,MYL1,ACTA1,MYH1                                                                                                                                                                                                                                                         |
| Glycogen Degradation II                 | 4,65  | PYGM,PGM1,PYGB,AGL                                                                                                                                                                                                                                                                                                       |
| Glycogen Degradation III                | 4,19  | PYGM,PGM1,PYGB,AGL                                                                                                                                                                                                                                                                                                       |
| Valine Degradation I                    | 4,11  | HIBCH,HADHB,HIBADH,DLD,HADHA                                                                                                                                                                                                                                                                                             |
| 2-ketoglutarate Dehydrogenase Complex   | 4     | DLST,DLD,OGDH                                                                                                                                                                                                                                                                                                            |
| Ketolysis                               | 4     | HADHB,OXCT1,HADHA                                                                                                                                                                                                                                                                                                        |
| Aspartate Degradation II                | 4     | GOT1,MDH2,GOT2                                                                                                                                                                                                                                                                                                           |
| Isoleucine Degradation I                | 3,84  | HSD17B10,HADHB,DLD,HADHA                                                                                                                                                                                                                                                                                                 |
| Epithelial Adherens Junction Signaling  | 3,8   | MYH4,MYL2,MYH8,ACTN2,TUBA4A,MYH7,TUBB,MYL1,MYH2,MYL4,ACTC1,ACTN3,ACTA 1,MYH1                                                                                                                                                                                                                                             |
| RhoA Signaling                          | 3,63  | PFN1,CFL2,MYL2,MYLPF,MYLK2,MYL4,PPP1CB,ACTC1,TTN,MYL1,ACTA1                                                                                                                                                                                                                                                              |
| ILK Signaling                           | 3,58  | MAP2K6,MYH4,MYL2,MYH8,ACTN2,MYH7,MYL1,MYH2,CFL2,FLNC,MYL4,ACTC1,ACTA1, ACTN3,MYH1                                                                                                                                                                                                                                        |
| Glutaryl-CoA Degradation                | 3,55  | HSD17B10,HADHB,HADHA,HADH                                                                                                                                                                                                                                                                                                |
| Tryptophan Degradation III (Eukaryotic) | 3,55  | HSD17B10,HADHB,HADHA,HADH                                                                                                                                                                                                                                                                                                |

## SUPPLEMENTARY DATA

|                                                                           |      |                                                                                                               |
|---------------------------------------------------------------------------|------|---------------------------------------------------------------------------------------------------------------|
| Regulation of Actin-based Motility by Rho                                 | 3,44 | PFN1,MYL2,MYLPF,MYL4,PPP1CB,GSN,ACTC1,MYL1,ACTA1                                                              |
| Acetyl-CoA Biosynthesis I (Pyruvate Dehydrogenase Complex)                | 3,41 | PDHA1,DLAT,DLD                                                                                                |
| Mitochondrial L-carnitine Shuttle Pathway                                 | 2,93 | CPT1B,CPT2,SLC27A1,ACSL1                                                                                      |
| Superoxide Radicals Degradation                                           | 2,74 | SOD1,SOD2,CAT                                                                                                 |
| Methylglyoxal Degradation III                                             | 2,74 | Akr1b10,FAM213B,AKR1B1                                                                                        |
| Creatine-phosphate Biosynthesis                                           | 2,66 | CKMT2,CKM                                                                                                     |
| Pyruvate Fermentation to Lactate                                          | 2,66 | Ldhd,LDHA                                                                                                     |
| Glycerol Degradation I                                                    | 2,66 | GPD1,GPD2                                                                                                     |
| Glycerol-3-phosphate Shuttle                                              | 2,66 | GPD1,GPD2                                                                                                     |
| Glutamate Degradation II                                                  | 2,66 | GOT1,GOT2                                                                                                     |
| Aspartate Biosynthesis                                                    | 2,66 | GOT1,GOT2                                                                                                     |
| Protein Kinase A Signaling                                                | 2,61 | H1FO,MYH4,YWHAG,YWHAE,MYL2,TNNI2,YWHAB,MYLPF,MYLK2,GNB2L1,YWHAZ,PPP1CB,PYGB,TTN,MYL1,MYH2,PYGM,FLNC,MYL4,RYR1 |
| EIF2 Signaling                                                            | 2,58 | RPS7,RPS4Y1,RPS10,RPS18,RPS19,RPLP2,PPP1CB,RPL12,RPS3,RPLP0,RPL10A,RPSA                                       |
| Phenylalanine Degradation IV (Mammalian, via Side Chain)                  | 2,33 | ALDH2,GOT1,GOT2                                                                                               |
| Superpathway of Methionine Degradation                                    | 2,27 | DLD,GOT1,MAT2A,GOT2                                                                                           |
| Phenylethylamine Degradation I                                            | 2,2  | AOC3,ALDH2                                                                                                    |
| L-cysteine Degradation I                                                  | 2,2  | GOT1,GOT2                                                                                                     |
| Ethanol Degradation IV                                                    | 2,17 | ALDH2,CAT,ACSL1                                                                                               |
| Stearate Biosynthesis I (Animals)                                         | 2,07 | FAM213B,FASN,SLC27A1,ACSL1                                                                                    |
| Mevalonate Pathway I                                                      | 1,91 | HADHB,HADHA                                                                                                   |
| Cell Cycle: G2/M DNA Damage Checkpoint Regulation                         | 1,76 | YWHAG,YWHAE,YWHAB,YWHAZ                                                                                       |
| Tight Junction Signaling                                                  | 1,73 | MYH4,MYH2,MYL2,MYH8,MYL4,MYH7,ACTC1,MYL1,ACTA1,MYH1                                                           |
| Remodeling of Epithelial Adherens Junctions                               | 1,72 | ACTN2,TUBA4A,TUBB,ACTC1,ACTA1,ACTN3                                                                           |
| Ketogenesis                                                               | 1,71 | HADHB,HADHA                                                                                                   |
| Sucrose Degradation V (Mammalian)                                         | 1,71 | TPI1,ALDOA                                                                                                    |
| Superpathway of Geranylgeranyldiphosphate Biosynthesis I (via Mevalonate) | 1,71 | HADHB,HADHA                                                                                                   |
| NRF2-mediated Oxidative Stress Response                                   | 1,7  | MAP2K6,GSTM1,SOD1,SOD2,GSTM5,PRDX1,STIP1,CAT,ACTC1,ACTA1,FTH1                                                 |
| Ethanol Degradation II                                                    | 1,6  | HSD17B10,ALDH2,ACSL1                                                                                          |
| Hepatic Fibrosis / Hepatic Stellate Cell Activation                       | 1,6  | COL1A2,MYH4,MYH2,MYL2,MYH8,MYL4,MYH7,MYL1,MYH1                                                                |
| PPAR $\alpha$ /RXR $\alpha$ Activation                                    | 1,47 | MAP2K6,ACADL,GPD1,HSP90AB1,GPD2,FASN,CPT1B,CD36,SLC27A1,GOT2                                                  |
| Fatty Acid Activation                                                     | 1,41 | SLC27A1,ACSL1                                                                                                 |
| Calcium Transport I                                                       | 1,41 | ATP2A1,ATP2A2                                                                                                 |
| Colanic Acid Building Blocks Biosynthesis                                 | 1,41 | GPI,UGP2                                                                                                      |
| Oxidative Ethanol Degradation                                             | 1,41 | ALDH2,ACSL1                                                                                                   |

## SUPPLEMENTARY DATA

|                                             |      |                              |
|---------------------------------------------|------|------------------------------|
| III                                         |      |                              |
| Myc Mediated Apoptosis Signaling            | 1,39 | YWHAG,YWHAE,CYCS,YWHAB,YWHAZ |
| Glucose and Glucose-1-phosphate Degradation | 1,33 | PGM1                         |
| Protein Citrullination                      | 1,33 | PADI2                        |
| Palmitate Biosynthesis I (Animals)          | 1,33 | FASN                         |
| Fatty Acid Biosynthesis Initiation II       | 1,33 | FASN                         |
| GDP-glucose Biosynthesis                    | 1,33 | PGM1                         |
| Glutamate Biosynthesis II                   | 1,33 | GLUD1                        |
| Glutamate Degradation X                     | 1,33 | GLUD1                        |

**Supplementary Table S3B.** Canonical pathways significantly affected by insulin treatment of STZ-animals (STZ+I vs. STZ-I comparison). Table lists pathway names as given by Ingenuity Pathway Analysis software, pathway p-value (score, as  $-\log_{10}$  p-value derivative) and significantly affected molecular members of a given pathway.

| Pathway Name                                             | Score | Significantly affected proteins                                                         |
|----------------------------------------------------------|-------|-----------------------------------------------------------------------------------------|
| Glycolysis I                                             | 9,55  | Pkm,PGK1,GPI,TPI1,ENO3,PGAM2,ALDOA,PFKM,FBP2                                            |
| TCA Cycle II (Eukaryotic)                                | 7,99  | SDHA,SUCLA2,SDHB,CS,IDH3G,IDH3A,MDH2,IDH3B                                              |
| Glycolysis II                                            | 7,99  | PGK1,GPI,ENO3,PGAM2,ALDOA,ME1,MDH2,FBP2                                                 |
| Fatty Acid $\beta$ -oxidation I                          | 5,51  | HADHB,SLC27A1,ACAA2,ECI1,ACSL1,HADHA,HADH                                               |
| Calcium Signaling                                        | 5,21  | TNNT1,TNNI2,MYL2,TNNC2,ATP2A1,PRKAR2A,Tpm1,MYH7,ATP2A2,TNNT3,CASQ1,RYR1,ASPH,ACTA1,MYH1 |
| EIF2 Signaling                                           | 4,98  | RPS4Y1,RPL22,RPL27,RPS18,RPS19,RPLP0,RPL10A,RPS10,RPS16,RPLP2,RPL12,RPS3,PPP1CA,RPSA    |
| Ketolysis                                                | 4,37  | HADHB,OXCT1,HADHA                                                                       |
| Aspartate Degradation II                                 | 4,37  | GOT1,MDH2,GOT2                                                                          |
| Mitochondrial Dysfunction                                | 3,52  | SDHA,NDUFV1,SDHB,NDUFS1,SOD2,ATP5B,PARK7,GPD2,ATP5A1,UQCRC2,CAT,UQCRC1                  |
| Glycogen Degradation II                                  | 3,4   | PYGM,PGM1,PYGB                                                                          |
| Glycogen Degradation III                                 | 3,11  | PYGM,PGM1,PYGB                                                                          |
| Superoxide Radicals Degradation                          | 3,11  | SOD1,SOD2,CAT                                                                           |
| Creatine-phosphate Biosynthesis                          | 2,91  | CKMT2,CKM                                                                               |
| Pyruvate Fermentation to Lactate                         | 2,91  | Ldhd,LDHA                                                                               |
| Glycerol Degradation I                                   | 2,91  | GPD1,GPD2                                                                               |
| Glycerol-3-phosphate Shuttle                             | 2,91  | GPD1,GPD2                                                                               |
| Glutamate Degradation II                                 | 2,91  | GOT1,GOT2                                                                               |
| Aspartate Biosynthesis                                   | 2,91  | GOT1,GOT2                                                                               |
| Actin Cytoskeleton Signaling                             | 2,73  | PFN1,CFL2,MYL2,MYLPP,ACTN2,MYLK2,MYH7,GSN,TTN,ACTA1,ACTN3,MYH1                          |
| Glutaryl-CoA Degradation                                 | 2,68  | HADHB,HADHA,HADH                                                                        |
| Phenylalanine Degradation IV (Mammalian, via Side Chain) | 2,68  | ALDH2,GOT1,GOT2                                                                         |
| Tryptophan Degradation III (Eukaryotic)                  | 2,68  | HADHB,HADHA,HADH                                                                        |
| RhoA Signaling                                           | 2,66  | PFN1,CFL2,MYL2,MYLPP,MYLK2,PFN2,TTN,ACTA1                                               |

## SUPPLEMENTARY DATA

|                                                                           |      |                                                                                            |
|---------------------------------------------------------------------------|------|--------------------------------------------------------------------------------------------|
| Ethanol Degradation IV                                                    | 2,52 | ALDH2,CAT,ACSL1                                                                            |
| Protein Kinase A Signaling                                                | 2,45 | H1F0,YWHAG,YWHAE,TNNI2,MYL2,YWHAB,MYLPF,MYLK2,YWHAZ,PRKAR2A,PYGB,TTN,PYGM,PHKB,RYR1,PPP1CA |
| Phenylethylamine Degradation I                                            | 2,45 | AOC3,ALDH2                                                                                 |
| L-cysteine Degradation I                                                  | 2,45 | GOT1,GOT2                                                                                  |
| tRNA Charging                                                             | 2,43 | TARSL2,GARS,DARS,EPRS                                                                      |
| Nitric Oxide Signaling in the Cardiovascular System                       | 2,4  | HSP90AB1,CACNA1S,ATP2A1,CAV1,PRKAR2A,ATP2A2                                                |
| Cellular Effects of Sildenafil (Viagra)                                   | 2,37 | MYL2,MYLPF,CACNA1S,PRKAR2A,MYH7,ACTA1,MYH1                                                 |
| Cell Cycle: G2/M DNA Damage Checkpoint Regulation                         | 2,19 | YWHAG,YWHAE,YWHAB,YWHAZ                                                                    |
| Mevalonate Pathway I                                                      | 2,16 | HADHB,HADHA                                                                                |
| Ketogenesis                                                               | 1,94 | HADHB,HADHA                                                                                |
| Sucrose Degradation V (Mammalian)                                         | 1,94 | TPI1,ALDOA                                                                                 |
| Superpathway of Geranylgeranyldiphosphate Biosynthesis I (via Mevalonate) | 1,94 | HADHB,HADHA                                                                                |
| Ethanol Degradation II                                                    | 1,94 | ADH5,ALDH2,ACSL1                                                                           |
| Regulation of eIF4 and p70S6K Signaling                                   | 1,83 | RPS4Y1,RPS10,PPP2R2A,RPS16,RPS18,RPS19,RPS3,RPSA                                           |
| PPAR $\alpha$ /RXR $\alpha$ Activation                                    | 1,81 | ACADL,GPD1,HSP90AB1,GPD2,ADIPOQ,PRKAR2A,CD36,SLC27A1,GOT2                                  |
| Superpathway of Methionine Degradation                                    | 1,77 | GOT1,MAT2A,GOT2                                                                            |
| Epithelial Adherens Junction Signaling                                    | 1,68 | TUBA1A,MYL2,TUBB4B,ACTN2,MYH7,ACTA1,ACTN3,MYH1                                             |
| NRF2-mediated Oxidative Stress Response                                   | 1,68 | GSTM1,SOD1,SOD2,GSTM5,PRDX1,CAT,VCP,ACTA1,FTH1                                             |
| Remodeling of Epithelial Adherens Junctions                               | 1,67 | TUBA1A,TUBB4B,ACTN2,ACTA1,ACTN3                                                            |
| Fatty Acid Activation                                                     | 1,64 | SLC27A1,ACSL1                                                                              |
| Isoleucine Degradation I                                                  | 1,64 | HADHB,HADHA                                                                                |
| Calcium Transport I                                                       | 1,64 | ATP2A1,ATP2A2                                                                              |
| Colanic Acid Building Blocks Biosynthesis                                 | 1,64 | GPI,UGP2                                                                                   |
| Oxidative Ethanol Degradation III                                         | 1,64 | ALDH2,ACSL1                                                                                |
| Regulation of Actin-based Motility by Rho                                 | 1,56 | PFN1,MYL2,MYLPF,GSN,ACTA1                                                                  |
| Cardiomyocyte Differentiation via BMP Receptors                           | 1,53 | MYL2,MYH7                                                                                  |
| Glucose and Glucose-1-phosphate Degradation                               | 1,46 | PGM1                                                                                       |
| Spermine Biosynthesis                                                     | 1,46 | SMS                                                                                        |
| GDP-glucose Biosynthesis                                                  | 1,46 | PGM1                                                                                       |
| Formaldehyde Oxidation II (Glutathione-dependent)                         | 1,46 | ADH5                                                                                       |
| 14-3-3-mediated Signaling                                                 | 1,46 | YWHAG,TUBA1A,YWHAE,TUBB4B,YWHAB,YWHAZ                                                      |
| $\gamma$ -linolenate Biosynthesis II (Animals)                            | 1,43 | SLC27A1,ACSL1                                                                              |
| Cardiac $\beta$ -adrenergic Signaling                                     | 1,38 | PPP2R2A,CACNA1S,ATP2A1,PRKAR2A,PPP1CA,ATP2A2                                               |
| ILK Signaling                                                             | 1,32 | CFL2,MYL2,PPP2R2A,ACTN2,MYH7,ACTA1,ACTN3,MYH1                                              |



SUPPLEMENTARY DATA

**Supplementary Table S3C.** Canonical pathways significantly different between insulin treated and non-diabetic animals (STZ+I vs. ND comparison). Table lists pathway names as given by Ingenuity Pathway Analysis software, pathway p-value (score, as  $-\text{Log}_{10}$  p-value derivative) and significantly affected molecular members of a given pathway.

| Pathway Name                                               | Score | Significantly affected proteins                                                                                                                                                                                                               |
|------------------------------------------------------------|-------|-----------------------------------------------------------------------------------------------------------------------------------------------------------------------------------------------------------------------------------------------|
| Mitochondrial Dysfunction                                  | 27    | HSD17B10,SDHB,NDUFA9,NDUFA10,PRDX5,CPT1B,NDUFB5,COX2,NDUFA2,PDHA1,NDUFA5,NDUFS1,SOD2,GPD2,UQCRC1,NDUFS2,OGDH,COX411,NDUFS4,NDUFA8,COX1,SDHA,NDUFV1,NDUFB3,CYCS,ATP5A1,NDUFA13,ATP5C1,NDUFS5,PRDX3,ATP5B,NDUFA6,UQCRC2,COX5A,CYC1,UQCRC1,COX5B |
| TCA Cycle II (Eukaryotic)                                  | 19.3  | SDHA,SDHB,IDH3G,ACO2,SUCLA2,CS,SUCLG1,DLST,DLD,IDH3A,FH,MDH2,OGDH,IDH3B                                                                                                                                                                       |
| Calcium Signaling                                          | 9.65  | MYH4,TNNT1,MYL2,TNNI2,TNNC2,MYH8,TNNC1,ATP2A1,PRKAR2A,TPM3,TPM2,Tpm1,ATP2A2,MYL1,MYH2,TNNT3,MYL4,RYR1,ACTC1,ACTA1,MYH1                                                                                                                        |
| Fatty Acid $\beta$ -oxidation I                            | 8.01  | HSD17B10,HADHB,SLC27A1,ACADM,ACAA2,ECI1,ACSL1,HADHA,HADH                                                                                                                                                                                      |
| Cellular Effects of Sildenafil (Viagra)                    | 5.23  | MYH4,MYH2,MYL2,MYH8,MYLPF,PRKAR2A,MYL4,ACTC1,MYL1,ACTA1,MYH1                                                                                                                                                                                  |
| Valine Degradation I                                       | 4.66  | HIBCH,HADHB,HIBADH,DLD,HADHA                                                                                                                                                                                                                  |
| 2-ketoglutarate Dehydrogenase Complex                      | 4.34  | DLST,DLD,OGDH                                                                                                                                                                                                                                 |
| Ketolysis                                                  | 4.34  | HADHB,OXCT1,HADHA                                                                                                                                                                                                                             |
| Aspartate Degradation II                                   | 4.34  | GOT1,MDH2,GOT2                                                                                                                                                                                                                                |
| Isoleucine Degradation I                                   | 4.29  | HSD17B10,HADHB,DLD,HADHA                                                                                                                                                                                                                      |
| Glutaryl-CoA Degradation                                   | 4     | HSD17B10,HADHB,HADHA,HADH                                                                                                                                                                                                                     |
| Tryptophan Degradation III (Eukaryotic)                    | 4     | HSD17B10,HADHB,HADHA,HADH                                                                                                                                                                                                                     |
| Gluconeogenesis I                                          | 3.9   | PGK1,ENO3,ALDOA,ME1,MDH2                                                                                                                                                                                                                      |
| Epithelial Adherens Junction Signaling                     | 3.76  | MYH4,MYH2,MYL2,MYH8,ACTN2,TUBA4A,MYL4,ACTC1,MYL1,ACTA1,ACTN3,MYH1                                                                                                                                                                             |
| Acetyl-CoA Biosynthesis I (Pyruvate Dehydrogenase Complex) | 3.75  | PDHA1,DLAT,DLD                                                                                                                                                                                                                                |
| Actin Cytoskeleton Signaling                               | 3.69  | MYH4,MYL2,MYH8,MYLPF,ACTN2,GSN,TTN,MYL1,MYH2,MYL4,ACTC1,ACTN3,ACTA1,MYH1                                                                                                                                                                      |
| ILK Signaling                                              | 3.67  | MYH4,MYL2,MYH8,ACTN2,MYL1,PPP2R1A,MYH2,FLNC,MYL4,ACTC1,ACTA1,ACTN3,MYH1                                                                                                                                                                       |

## SUPPLEMENTARY DATA

|                                                                           |      | 1                                                                   |
|---------------------------------------------------------------------------|------|---------------------------------------------------------------------|
| Mitochondrial L-carnitine Shuttle Pathway                                 | 3.36 | CPT1B,CPT2,SLC27A1,ACSL1                                            |
| Tight Junction Signaling                                                  | 3.05 | MYH4,PPP2R1A,MYH2,MYL2,MYH8,PRKAR2A,MYL4,ACTC1,MYL1,ACTA1,MYH1      |
| NRF2-mediated Oxidative Stress Response                                   | 3.04 | GSTM1,SOD1,SOD2,GSTM5,PRDX1,STIP1,VCP,DNAJA2,ACTC1,ACTA1,MGST3,FTH1 |
| Pyruvate Fermentation to Lactate                                          | 2.89 | Ldhb,LDHA                                                           |
| Glycerol Degradation I                                                    | 2.89 | GPD1,GPD2                                                           |
| Glycerol-3-phosphate Shuttle                                              | 2.89 | GPD1,GPD2                                                           |
| Glutamate Degradation II                                                  | 2.89 | GOT1,GOT2                                                           |
| Aspartate Biosynthesis                                                    | 2.89 | GOT1,GOT2                                                           |
| Glycolysis I                                                              | 2.8  | PGK1,ENO3,ALDOA,PFKM                                                |
| Regulation of Actin-based Motility by Rho                                 | 2.79 | MYL2,MYLPF,MYL4,GSN,ACTC1,MYL1,ACTA1                                |
| Phenylalanine Degradation IV (Mammalian, via Side Chain)                  | 2.65 | ALDH2,GOT1,GOT2                                                     |
| L-cysteine Degradation I                                                  | 2.43 | GOT1,GOT2                                                           |
| PPAR $\alpha$ /RXR $\alpha$ Activation                                    | 2.21 | ACADL,GPD1,HSP90AB1,GPD2,FASN,CPT1B,PRKAR2A,CD36,SLC27A1,GOT2       |
| Mevalonate Pathway I                                                      | 2.14 | HADHB,HADHA                                                         |
| Glutathione-mediated Detoxification                                       | 2.11 | GSTM1,GSTM5,MGST3                                                   |
| RhoA Signaling                                                            | 2.02 | MYL2,MYLPF,MYL4,ACTC1,TTN,MYL1,ACTA1                                |
| Ketogenesis                                                               | 1.93 | HADHB,HADHA                                                         |
| Glycogen Degradation II                                                   | 1.93 | PYGM,PGM1                                                           |
| Superpathway of Geranylgeranyldiphosphate Biosynthesis I (via Mevalonate) | 1.93 | HADHB,HADHA                                                         |
| Ethanol Degradation II                                                    | 1.91 | HSD17B10,ALDH2,ACSL1                                                |
| Hepatic Fibrosis / Hepatic Stellate Cell Activation                       | 1.8  | COL1A2,MYH4,MYH2,MYL2,MYH8,MYL4,MYL1,MYH1                           |

## SUPPLEMENTARY DATA

|                                                |      |                                                                             |
|------------------------------------------------|------|-----------------------------------------------------------------------------|
| Glycogen Degradation III                       | 1.76 | PYGM,PGM1                                                                   |
| Superoxide Radicals Degradation                | 1.76 | SOD1,SOD2                                                                   |
| Superpathway of Methionine Degradation         | 1.75 | DLD,GOT1,GOT2                                                               |
| LPS/IL-1 Mediated Inhibition of RXR Function   | 1.71 | GSTM1,GSTM5,CPT1B,CPT2,FABP4,SLC27A1,FABP3,ACSL1,MGST3                      |
| Protein Kinase A Signaling                     | 1.65 | MYH4,YWHAG,MYL2,TNNI2,MYLPF,YWHAZ,PRKAR2A,TTN,MYL1,MYH2,PYGM,FLNC,MYL4,RYR1 |
| Remodeling of Epithelial Adherens Junctions    | 1.63 | ACTN2,TUBA4A,ACTC1,ACTA1,ACTN3                                              |
| Fatty Acid Activation                          | 1.62 | SLC27A1,ACSL1                                                               |
| Calcium Transport I                            | 1.62 | ATP2A1,ATP2A2                                                               |
| Oxidative Ethanol Degradation III              | 1.62 | ALDH2,ACSL1                                                                 |
| Stearate Biosynthesis I (Animals)              | 1.61 | FASN,SLC27A1,ACSL1                                                          |
| Glucose and Glucose-1-phosphate Degradation    | 1.45 | PGM1                                                                        |
| Protein Citrullination                         | 1.45 | PADI2                                                                       |
| Palmitate Biosynthesis I (Animals)             | 1.45 | FASN                                                                        |
| Fatty Acid Biosynthesis Initiation II          | 1.45 | FASN                                                                        |
| GDP-glucose Biosynthesis                       | 1.45 | PGM1                                                                        |
| TR/RXR Activation                              | 1.43 | SLC16A3,COL6A3,FASN,ATP2A1,ME1                                              |
| $\gamma$ -linolenate Biosynthesis II (Animals) | 1.41 | SLC27A1,ACSL1                                                               |
| Ethanol Degradation IV                         | 1.41 | ALDH2,ACSL1                                                                 |

SUPPLEMENTARY DATA

**Supplementary Table S4.** Individual mitochondrial protein data from **Figure S3**. Table lists 111 mitochondrial proteins, protein symbols, names and accession numbers as given by UniProt database, together with their expression ratio (in log2 scale), p-value (base and in  $-\log_{10}$  scale) and Ingenuity IPA protein group affiliation (Group). Proteins are listed in alphabetical order by their symbols. Mitochondrial localization according to MitoCarta mitochondrial proteome database.

| Symbol | Entrez Gene Name                                                                                     | Accession # | Log2<br>(STZ-I vs<br>ND) | p-value<br>(STZ-I vs<br>ND) | Log2<br>(STZ+I vs<br>ND) | p-value<br>(STZ+I vs<br>ND) | Group                      |
|--------|------------------------------------------------------------------------------------------------------|-------------|--------------------------|-----------------------------|--------------------------|-----------------------------|----------------------------|
| ACAA2  | acetyl-CoA acyltransferase 2                                                                         | Q8BWT1      | -0.672                   | 1.8E-42                     | -0.523                   | 1.1E-27                     | Lipid metabolism           |
| ACADL  | acyl-CoA dehydrogenase, long chain                                                                   | P51174      | -0.461                   | 4.7E-19                     | -0.510                   | 3.7E-23                     | Lipid metabolism           |
| ACADM  | acyl-CoA dehydrogenase, C-4 to C-12 straight chain                                                   | Q91WS8      | -0.512                   | 8.0E-13                     | -0.454                   | 1.3E-13                     | Lipid metabolism           |
| ACADVL | acyl-CoA dehydrogenase, very long chain                                                              | B1AR27      | -0.246                   | 2.2E-16                     | -0.301                   | 4.4E-16                     | Lipid metabolism           |
| ACAT1  | acetyl-CoA acetyltransferase 1                                                                       | Q8QZT1      | -0.440                   | 7.89E-25                    | -0.295                   | 1.12E-12                    | Lipid metabolism           |
| ACO2   | aconitase 2, mitochondrial                                                                           | Q99KI0      | 0.073                    | 3.8E-08                     | 0.050                    | 1.4E-04                     | TCA Cycle                  |
| ACSL1  | acyl-CoA synthetase long-chain family member 1                                                       | P41216      | -0.235                   | 5.8E-19                     | -0.318                   | 1.9E-42                     | Lipid metabolism           |
| ADCK3  | aarF domain containing kinase 3                                                                      | Q60936      | 0.285                    | 3.6E-03                     | -0.288                   | 3.2E-02                     | Respiratory chain, related |
| ALDH2  | aldehyde dehydrogenase 2 family (mitochondrial)                                                      | P47738      | -0.156                   | 9.1E-03                     | -0.453                   | 2.4E-13                     | Ethanol degradation        |
| ATP5A1 | ATP synthase, H <sup>+</sup> transporting, mitochondrial F1 complex, alpha subunit 1, cardiac muscle | D3Z6F5      | -0.185                   | 1.0E-07                     | -0.118                   | 7.0E-05                     | Respiratory chain          |
| ATP5B  | ATP synthase, H <sup>+</sup> transporting, mitochondrial F1 complex, beta polypeptide                | P56480      | -0.202                   | 4.4E-16                     | -0.127                   | 4.3E-07                     | Respiratory chain          |
| ATP5C1 | ATP synthase, H <sup>+</sup> transporting, mitochondrial F1 complex, gamma polypeptide 1             | A2AKU9      | -0.150                   | 5.2E-05                     | -0.144                   | 2.4E-06                     | Respiratory chain          |
| ATP5F1 | ATP synthase, H <sup>+</sup> transporting, mitochondrial Fo complex, subunit B1                      | Q5I0W0      | -0.238                   | 6.7E-08                     | -0.200                   | 2.5E-06                     | Respiratory chain          |

## SUPPLEMENTARY DATA

|        |                                                                    |        |        |         |        |         |                                 |
|--------|--------------------------------------------------------------------|--------|--------|---------|--------|---------|---------------------------------|
| Atp5h  | ATP synthase, H+ transporting, mitochondrial F0 complex, subunit d | Q9DCX2 | -0.300 | 5.1E-12 | -0.250 | 4.0E-11 | Respiratory chain               |
| ATP5I  | ATP synthase, H+ transporting, mitochondrial Fo complex, subunit E | Q5EBI8 | -0.211 | 2.9E-04 | -0.177 | 1.4E-03 | Respiratory chain               |
| ATP5L  | ATP synthase, H+ transporting, mitochondrial Fo complex, subunit G | Q9CPQ8 | -0.286 | 1.3E-04 | -0.261 | 2.7E-05 | Respiratory chain               |
| ATP5O  | ATP synthase, H+ transporting, mitochondrial F1 complex, O subunit | Q9DB20 | -0.201 | 2.9E-05 | -0.161 | 9.0E-05 | Respiratory chain               |
| CAPZA2 | capping protein (actin filament) muscle Z-line, alpha 2            | Q5DQJ3 | 0.707  | 5.6E-22 | 0.763  | 4.2E-23 |                                 |
| CHCHD3 | coiled-coil-helix-coiled-coil-helix domain containing 3            | Q9CRB9 | -0.315 | 2.0E-04 | -0.231 | 3.0E-02 | Mitochondrial cristae integrity |
| CISD1  | CDGSH iron sulfur domain 1                                         | Q91WS0 | -0.130 | 2.6E-02 | -0.145 | 3.8E-03 | Mitochondrial                   |
| CKMT2  | creatine kinase, mitochondrial 2 (sarcomeric)                      | Q6P8J7 | -0.646 | 4.5E-88 | -0.379 | 2.6E-54 | Mitochondrial transport         |
| COQ9   | coenzyme Q9 homolog (S. cerevisiae)                                | Q8K1Z0 | -0.337 | 2.5E-09 | -0.245 | 2.0E-05 | Ubiquinone biosynthesis         |
| COX1   | cytochrome c oxidase subunit I                                     | Q9MD68 | -0.392 | 2.6E-09 | -0.269 | 1.8E-04 | Respiratory chain               |
| COX2   | cytochrome c oxidase subunit II                                    | P00405 | -0.331 | 1.6E-05 | -0.213 | 3.3E-04 | Respiratory chain               |
| COX4I1 | cytochrome c oxidase subunit IV isoform 1                          | P19783 | -0.321 | 2.6E-04 | -0.211 | 4.7E-03 | Respiratory chain               |
| COX5A  | cytochrome c oxidase subunit Va                                    | P12787 | -0.386 | 1.3E-02 | -0.267 | 4.7E-03 | Respiratory chain               |
| COX5B  | cytochrome c oxidase subunit Vb                                    | P19536 | -0.374 | 1.5E-04 | -0.256 | 4.4E-03 | Respiratory chain               |
| CPT1B  | carnitine palmitoyltransferase 1B (muscle)                         | Q3UIM5 | -0.226 | 1.4E-10 | -0.246 | 3.0E-12 | Lipid metabolism                |
| CPT2   | carnitine palmitoyltransferase 2                                   | P52825 | -0.345 | 1.0E-04 | -0.324 | 3.8E-04 | Lipid metabolism                |

SUPPLEMENTARY DATA

|       |                                                                                   |        |        |          |        |          |                                 |
|-------|-----------------------------------------------------------------------------------|--------|--------|----------|--------|----------|---------------------------------|
| CRAT  | carnitine O-acetyltransferase                                                     | Q3V1Y3 | -0.268 | 1.2E-10  | -0.253 | 1.1E-06  | Lipid metabolism                |
| CS    | citrate synthase                                                                  | Q9CZU6 | -0.211 | 3.0E-10  | -0.123 | 2.2E-04  | TCA Cycle                       |
| CYC1  | cytochrome c-1                                                                    | Q9D0M3 | -0.365 | 1.3E-05  | -0.266 | 1.9E-03  | Respiratory chain               |
| CYCS  | cytochrome c, somatic                                                             | Q56A15 | -0.259 | 7.8E-09  | -0.229 | 5.1E-06  | Respiratory chain               |
| DECR1 | 2,4-dienoyl CoA reductase 1, mitochondrial                                        | Q4FJK0 | -0.296 | 2.3E-07  | -0.327 | 3.1E-10  | Lipid metabolism                |
| DLAT  | dihydrolipoamide S-acetyltransferase                                              | Q8BMF4 | -0.251 | 3.6E-19  | -0.257 | 6.8E-20  | Lipid metabolism                |
| DLD   | dihydrolipoamide dehydrogenase                                                    | O08749 | -0.114 | 1.6E-04  | -0.127 | 8.1E-06  | Lipid metabolism                |
| DLST  | dihydrolipoamide S-succinyltransferase (E2 component of 2-oxo-glutarate complex)  | Q9D2G2 | -0.318 | 1.1E-05  | -0.295 | 2.8E-04  | Lipid metabolism                |
| ECI1  | enoyl-CoA delta isomerase 1                                                       | Q8QZV3 | -0.289 | 6.8E-08  | -0.268 | 2.4E-08  | Lipid metabolism                |
| ECHS1 | enoyl CoA hydratase, short chain, 1, mitochondrial                                | Q8BH95 | -0,310 | 7,98E-03 | -0,292 | 1,21E-02 | Lipid metabolism                |
| ETFA  | electron-transfer-flavoprotein, alpha polypeptide                                 | Q99LC5 | -0.286 | 3.8E-10  | -0.272 | 6.4E-30  | Respiratory chain               |
| ETFB  | electron-transfer-flavoprotein, beta polypeptide                                  | Q9DCW4 | -0.373 | 3.6E-14  | -0.315 | 5.1E-18  | Respiratory chain               |
| ETFDH | electron-transferring-flavoprotein dehydrogenase                                  | Q6PF96 | -0.422 | 3.78E-08 | -0.386 | 2.69E-07 | Respiratory chain               |
| FH    | fumarate hydratase                                                                | P97807 | -0.237 | 3.2E-04  | 0.097  | 2.3E-03  | TCA Cycle                       |
| Gapdh | glyceraldehyde-3-phosphate dehydrogenase                                          | P16858 | 0.102  | 1.28E-14 | 0.073  | 2.24E-13 | Glycolysis/Glycogen degradation |
| GOT2  | glutamic-oxaloacetic transaminase 2, mitochondrial (aspartate aminotransferase 2) | P05202 | -0.377 | 1.1E-19  | -0.251 | 9.7E-13  | Lipid metabolism                |
| GPD2  | glycerol-3-phosphate dehydrogenase 2 (mitochondrial)                              | Q64521 | 0.110  | 1.8E-02  | 0.225  | 3.5E-07  | Lipid metabolism                |

SUPPLEMENTARY DATA

|                    |                                                                                                                  |        |        |         |        |         |                                                                |
|--------------------|------------------------------------------------------------------------------------------------------------------|--------|--------|---------|--------|---------|----------------------------------------------------------------|
| GSTM5              | glutathione S-transferase mu 5                                                                                   | P10649 | 0.303  | 3.2E-07 | 0.149  | 1.2E-02 | Free Radical Scavenging/Protein ubiquitination/Protein Folding |
| HADH               | hydroxyacyl-CoA dehydrogenase                                                                                    | Q61425 | -0.334 | 8.7E-05 | -0.361 | 2.4E-06 | Lipid metabolism                                               |
| HADHA              | hydroxyacyl-CoA dehydrogenase/3-ketoacyl-CoA thiolase/enoyl-CoA hydratase (trifunctional protein), alpha subunit | Q8BMS1 | 0.179  | 4.4E-16 | -0.255 | 6.9E-25 | Lipid metabolism                                               |
| HADHB              | hydroxyacyl-CoA dehydrogenase/3-ketoacyl-CoA thiolase/enoyl-CoA hydratase (trifunctional protein), beta subunit  | Q99JY0 | -0.162 | 2.1E-13 | -0.235 | 8.5E-27 | Lipid metabolism                                               |
| HIBADH             | 3-hydroxyisobutyrate dehydrogenase                                                                               | Q99L13 | -0.380 | 4.8E-03 | -0.445 | 9.2E-04 | Valine Degradation                                             |
| HIBCH              | 3-hydroxyisobutyryl-CoA hydrolase                                                                                | Q8QZS1 | -0.255 | 1.7E-03 | -0.179 | 4.2E-02 | Valine Degradation                                             |
| HSD17B10 ; M/SCHAD | hydroxysteroid (17-beta) dehydrogenase 10                                                                        | Q99N15 | -0.162 | 3.3E-03 | -0.137 | 3.1E-02 | Lipid metabolism                                               |
| HSP90AB1           | heat shock protein 90kDa alpha (cytosolic), class B member 1                                                     | Q71LX8 | -0.291 | 1.4E-13 | -0.110 | 4.1E-04 | Free Radical Scavenging/Protein ubiquitination/Protein Folding |
| HSPA9              | heat shock 70kDa protein 9 (mortalin)                                                                            | P38647 | -0.423 | 9.3E-20 | -0.265 | 8.5E-10 | Free Radical Scavenging/Protein ubiquitination/Protein Folding |
| HSPD1              | heat shock 60kDa protein 1 (chaperonin)                                                                          | P63038 | -0.248 | 3.1E-18 | -0.216 | 5.1E-13 | Free Radical Scavenging/Protein ubiquitination/Protein Folding |
| HSPE1              | heat shock 10kDa protein 1 (chaperonin 10)                                                                       | Q4KL76 | -0.348 | 7.8E-04 | -0.238 | 4.1E-02 | Free Radical Scavenging/Protein ubiquitination/Protein Folding |
| IDH2               | isocitrate dehydrogenase 2                                                                                       | P54071 | 0.472  | 3.9E-19 | -0.242 | 2.9E-13 | TCA Cycle                                                      |

SUPPLEMENTARY DATA

|         |                                                               |        |        |          |        |          |                                                                |
|---------|---------------------------------------------------------------|--------|--------|----------|--------|----------|----------------------------------------------------------------|
|         | (NADP+), mitochondrial                                        |        |        |          |        |          |                                                                |
| IDH3A   | isocitrate dehydrogenase 3 (NAD+) alpha                       | Q9D6R2 | -0.303 | 4.2E-15  | -0.181 | 7.4E-09  | TCA Cycle                                                      |
| IDH3B   | isocitrate dehydrogenase 3 (NAD+) beta                        | Q91VA7 | -0.319 | 3.5E-24  | -0.212 | 1.7E-11  | TCA Cycle                                                      |
| IDH3G   | isocitrate dehydrogenase 3 (NAD+) gamma                       | P70404 | -0.392 | 2.1E-10  | -0.235 | 1.1E-03  | TCA Cycle                                                      |
| IMMT    | inner membrane protein, mitochondrial                         | Q3TEY5 | -0.321 | 3.7E-39  | -0.287 | 1.5E-31  | Free Radical Scavenging/Protein ubiquitination/Protein Folding |
| LRPPRC  | leucine-rich pentatricopeptide repeat containing              | Q6PB66 | -0.711 | 4.6E-04  | -0.439 | 3.4E-02  | Lipid metabolism                                               |
| LETM1   | leucine zipper-EF-hand containing transmembrane protein 1     | Q9Z2I0 | -0.5   | 9.38E-05 | -0.402 | 1.28E-03 | Putative mitochondrial Ca(2+)/H(+) antiporter                  |
| MDH2    | malate dehydrogenase 2, NAD (mitochondrial)                   | P08249 | -0.198 | 9.9E-14  | -0.152 | 5.0E-11  | TCA Cycle                                                      |
| MPC2    | mitochondrial pyruvate carrier 2                              | Q9D023 | -0.514 | 3.4E-06  | -0.262 | 9.6E-03  | Mitochondrial transport                                        |
| NDUFA10 | NADH dehydrogenase (ubiquinone) 1 alpha subcomplex, 10, 42kDa | Q99LC3 | -0.334 | 4.9E-09  | -0.226 | 2.1E-03  | Respiratory chain                                              |
| NDUFA13 | NADH dehydrogenase (ubiquinone) 1 alpha subcomplex, 13        | Q9ERS2 | -0.367 | 3.2E-05  | -0.213 | 2.3E-03  | Respiratory chain                                              |
| NDUFA2  | NADH dehydrogenase (ubiquinone) 1 alpha subcomplex, 2, 8kDa   | Q9CQ75 | -0.485 | 8.4E-04  | -0.281 | 2.1E-02  | Respiratory chain                                              |
| NDUFA5  | NADH dehydrogenase (ubiquinone) 1 alpha subcomplex, 5, 13kDa  | Q9CPP6 | -0.414 | 3.0E-08  | -0.296 | 1.8E-05  | Respiratory chain                                              |
| NDUFA6  | NADH dehydrogenase (ubiquinone) 1 alpha subcomplex, 6, 14kDa  | Q9CQZ5 | -0.371 | 6.0E-12  | -0.319 | 4.4E-07  | Respiratory chain                                              |
| NDUFA8  | NADH dehydrogenase (ubiquinone) 1 alpha                       | Q9DCJ5 | -0.363 | 1.3E-05  | -0.256 | 1.1E-03  | Respiratory chain                                              |



SUPPLEMENTARY DATA

|        |                                                                                   |        |        |          |        |          |                       |
|--------|-----------------------------------------------------------------------------------|--------|--------|----------|--------|----------|-----------------------|
|        | subcomplex, 8, 19kDa                                                              |        |        |          |        |          |                       |
| NDUFA9 | NADH dehydrogenase (ubiquinone) 1 alpha subcomplex, 9, 39kDa                      | Q6GTD3 | -0.435 | 1.6E-07  | -0.317 | 3.9E-06  | Respiratory chain     |
| NDUFB3 | NADH dehydrogenase (ubiquinone) 1 beta subcomplex, 3, 12kDa                       | Q9D6H6 | -0.432 | 1.8E-03  | -0.311 | 2.0E-02  | Respiratory chain     |
| NDUFB5 | NADH dehydrogenase (ubiquinone) 1 beta subcomplex, 5, 16kDa                       | Q8BU20 | -0.332 | 4.4E-10  | -0.250 | 1.8E-05  | Respiratory chain     |
| NDUFS1 | NADH dehydrogenase (ubiquinone) Fe-S protein 1, 75kDa (NADH-coenzyme Q reductase) | Q91VD9 | -0.333 | 2.0E-15  | -0.221 | 1.8E-10  | Respiratory chain     |
| NDUFS2 | NADH dehydrogenase (ubiquinone) Fe-S protein 2, 49kDa (NADH-coenzyme Q reductase) | Q91WD5 | -0.327 | 2.9E-09  | -0.248 | 5.9E-05  | Respiratory chain     |
| NDUFS4 | NADH dehydrogenase (ubiquinone) Fe-S protein 4, 18kDa (NADH-coenzyme Q reductase) | Q923F9 | -0.312 | 3.0E-05  | -0.201 | 3.5E-03  | Respiratory chain     |
| NDUFS5 | NADH dehydrogenase (ubiquinone) Fe-S protein 5, 15kDa (NADH-coenzyme Q reductase) | Q99LY9 | -0.415 | 2.8E-03  | -0.319 | 1.5E-02  | Respiratory chain     |
| NDUFV1 | NADH dehydrogenase (ubiquinone) flavoprotein 1, 51kDa                             | Q91YT0 | -0.325 | 9.3E-14  | -0.206 | 1.0E-05  | Respiratory chain     |
| OGDH   | oxoglutarate (alpha-ketoglutarate) dehydrogenase (lipoamide)                      | Q60597 | -0.215 | 6.7E-08  | -0.212 | 1.0E-08  | TCA Cycle             |
| OXCT1  | 3-oxoacid CoA transferase 1                                                       | Q9D0K2 | -0.520 | 1.9E-21  | -0.212 | 2.5E-06  | Lipid metabolism      |
| PDHA1  | pyruvate dehydrogenase (lipoamide) alpha 1                                        | Q3UFJ3 | -0.392 | 3.5E-04  | -0.347 | 2.2E-03  | Glycolysis, TCA Cycle |
| PDHB   | pyruvate dehydrogenase (lipoamide) beta                                           | Q9D051 | -0.233 | 2.71E-06 | -0.189 | 2.45E-05 | Glycolysis, TCA Cycle |
| PDHX   | pyruvate dehydrogenase                                                            | Q8BKZ9 | -0.304 | 4.41E-09 | -0.26  | 4.91E-07 | Glycolysis, TCA Cycle |

SUPPLEMENTARY DATA

|          |                                                                                             |        |        |          |        |          |                                                                |
|----------|---------------------------------------------------------------------------------------------|--------|--------|----------|--------|----------|----------------------------------------------------------------|
|          | complex, component X                                                                        |        |        |          |        |          |                                                                |
| PDPR     | pyruvate dehydrogenase phosphatase regulatory subunit                                       | Q7TSQ8 | -0.412 | 2.1E-10  | -0.283 | 2.4E-06  | Glycolysis, TCA Cycle                                          |
| PHB      | prohibitin                                                                                  | P67778 | -0.248 | 1.2E-04  | -0.217 | 2.7E-04  | Free Radical Scavenging/Protein ubiquitination/Protein Folding |
| PRDX5    | peroxiredoxin 5                                                                             | P99029 | -0.299 | 4.8E-08  | -0.258 | 5.1E-06  | Free Radical Scavenging/Protein ubiquitination/Protein Folding |
| SAMM50   | sorting and assembly machinery component 50 homolog ( <i>S. cerevisiae</i> )                | Q8BGH2 | -0.229 | 3.70E-03 | -0.129 | 4.73E-02 | Mitochondrial protein complexes assembly                       |
| SDHA     | succinate dehydrogenase complex, subunit A, flavoprotein (Fp)                               | Q8K2B3 | -0.298 | 6.2E-21  | -0.197 | 4.2E-12  | Respiratory chain                                              |
| SDHB     | succinate dehydrogenase complex, subunit B, iron sulfur (Ip)                                | A2AA77 | -0.302 | 1.4E-09  | -0.167 | 3.6E-04  | Respiratory chain                                              |
| SDHC     | succinate dehydrogenase complex, subunit C, integral membrane protein, 15kDa                | Q5XK33 | -0.522 | 3.18E-03 | -0.378 | 2.13E-02 | Respiratory chain                                              |
| SLC25A11 | solute carrier family 25 (mitochondrial carrier; oxoglutarate carrier), member 11           | Q5SX53 | -0.388 | 7.8E-10  | -0.220 | 2.5E-04  | Mitochondrial transport                                        |
| SLC25A12 | solute carrier family 25 (aspartate/glutamate carrier), member 12                           | Q8BH59 | -0.176 | 8.5E-19  | -0.126 | 6.0E-12  | Mitochondrial transport                                        |
| SLC25A3  | solute carrier family 25 (mitochondrial carrier; phosphate carrier), member 3               | Q3THU8 | -0.348 | 8.6E-17  | -0.248 | 3.0E-12  | Mitochondrial transport                                        |
| SLC25A4  | solute carrier family 25 (mitochondrial carrier; adenine nucleotide translocator), member 4 | Q8BVI9 | -0.233 | 1.0E-04  | -0.138 | 4.3E-03  | Mitochondrial transport                                        |

SUPPLEMENTARY DATA

|         |                                                                                             |          |        |          |        |          |                                                                                             |
|---------|---------------------------------------------------------------------------------------------|----------|--------|----------|--------|----------|---------------------------------------------------------------------------------------------|
| SLC25A5 | solute carrier family 25 (mitochondrial carrier; adenine nucleotide translocator), member 5 | P51881   | -0.209 | 4.86E-05 | -0.149 | 6.23E-04 | Mitochondrial transport                                                                     |
| SOD1    | superoxide dismutase 1, soluble                                                             | P08228   | 0.213  | 9.2E-07  | -0.118 | 2.0E-02  | Free Radical Scavenging/Protein ubiquitination/Protein Folding                              |
| SOD2    | superoxide dismutase 2, mitochondrial                                                       | P09671   | -0.305 | 8.3E-07  | -0.173 | 6.3E-04  | Free Radical Scavenging/Protein ubiquitination/Protein Folding                              |
| SUCLA2  | succinate-CoA ligase, ADP-forming, beta subunit                                             | Q3U6C7   | -0.240 | 3.2E-11  | -0.186 | 6.3E-10  | TCA Cycle                                                                                   |
| SUCLG1  | succinate-CoA ligase, alpha subunit                                                         | Q9WUM5   | -0.246 | 2.1E-11  | -0.214 | 1.4E-07  | TCA Cycle                                                                                   |
| TUFM    | Tu translation elongation factor, mitochondrial                                             | Q8BFR5   | -0.179 | 1.6E-05  | 0.107  | 7.9E-03  | Mitochondrial protein translation                                                           |
| UQCRB   | ubiquinol-cytochrome c reductase binding protein                                            | Q9D855   | -0.399 | 2.07E-09 | -0.336 | 2.25E-07 | Respiratory chain                                                                           |
| UQCRC1  | ubiquinol-cytochrome c reductase core protein I                                             | Q3TIC8   | -0.230 | 8.3E-07  | -0.169 | 9.2E-05  | Respiratory chain                                                                           |
| UQCRC2  | ubiquinol-cytochrome c reductase core protein II                                            | Q9DB77   | -0.254 | 1.2E-19  | -0.165 | 1.5E-12  | Respiratory chain                                                                           |
| UQCRFS1 | ubiquinol-cytochrome c reductase, Rieske iron-sulfur polypeptide 1                          | Q9CR68   | -0.331 | 5.3E-31  | -0.211 | 1.4E-10  | Respiratory chain                                                                           |
| VDAC1   | voltage-dependent anion channel 1                                                           | Q60932-2 | -0.159 | 2.1E-05  | -0.112 | 6.0E-03  | Mitochondrial transport                                                                     |
| VDAC2   | voltage-dependent anion channel 2                                                           | Q60930   | -0.165 | 3.6E-04  | -0.119 | 1.0E-02  | Mitochondrial transport                                                                     |
| YWHAZ   | tyrosine 3-monooxygenase/tryptophan 5-monooxygenase activation protein, zeta polypeptide    | P63101   | 0.139  | 4.3E-03  | -0.146 | 7.9E-03  | Free Radical Scavenging/Protein ubiquitination/Protein Folding/Mitochondrial protein import |

SUPPLEMENTARY DATA

**Supplementary Figure S1. Effects of insulin on body composition, blood parameters, and whole-body energy metabolism.** Insulin replacement restored body weight, lean mass, and fat mass in STZ-induced diabetic mice (A). Insulin replacement also corrected changes in total body water and bladder water volume observed with insulin deprivation (B), while not affecting body hydration ratio (C). Plasma glucose (D), ketones (E), free fatty acids (F) and percentage of HbA1C (G) were elevated by insulin deprivation and corrected by insulin treatment. Results of 24h indirect calorimetry indicate that although insulin treatment was unable to fully compensate for the decrease in respiratory quotient (RQ, J), total 24h energy expenditure (TEE, K) and physical activity (L), it was able to decrease resting metabolic rate (RMR, M). Both oxygen and carbon dioxide flux (H,I) lower in STZ-I and  $VO_2$  was lower in STZ-I than in ND. Data are means  $\pm$ SEM. N=8 per group. \* denotes  $p < 0.05$  vs. non-diabetic, # denotes  $p < 0.05$  vs. STZ-I group.

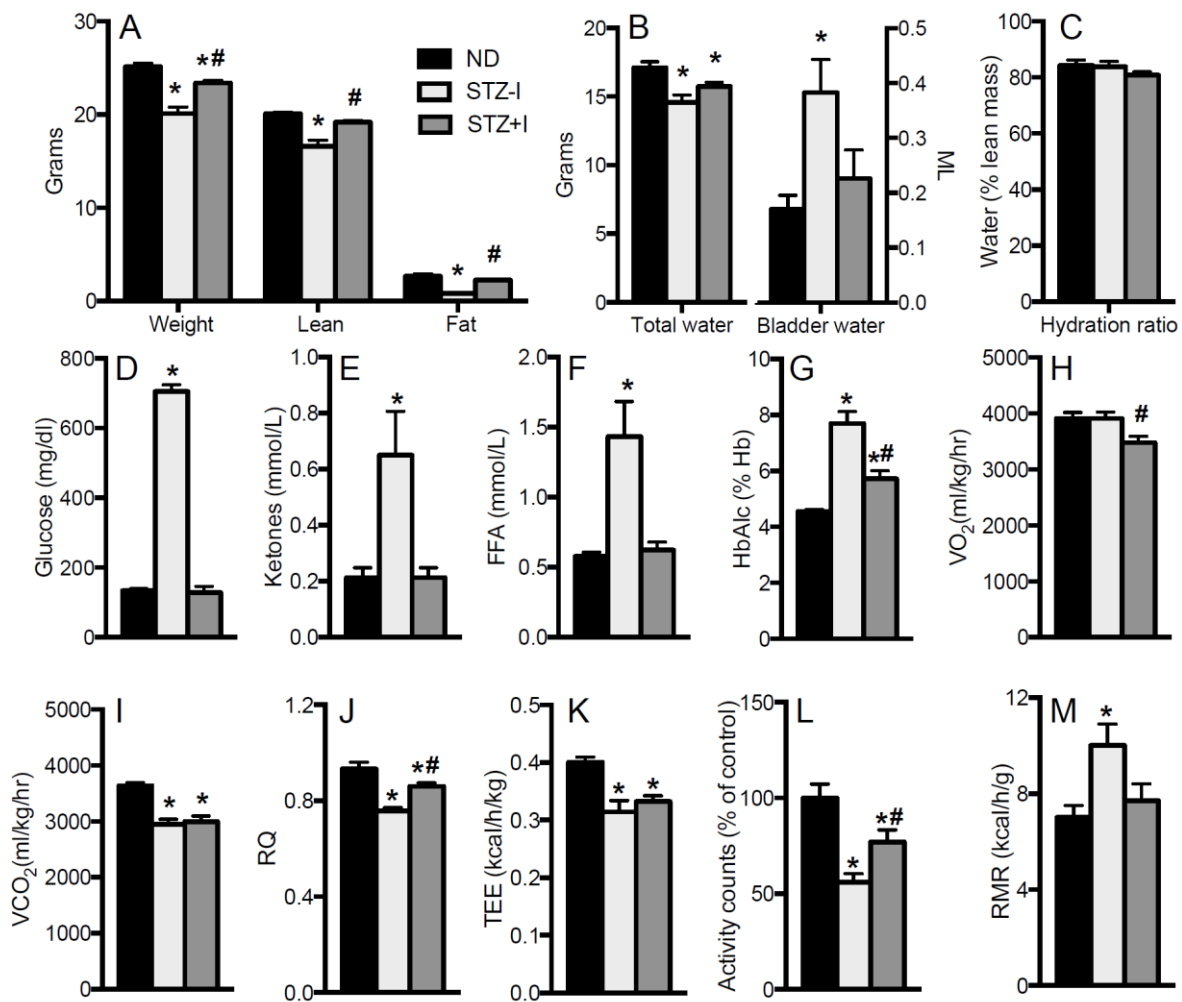

SUPPLEMENTARY DATA

**Supplementary Figure S2.** The effect of insulin deprivation and treatment on mitochondrial oxygen consumption (**Panel A**) ATP production (**Panel B**) and H<sub>2</sub>O<sub>2</sub> emission (**Panel C**) as calculated per muscle tissue weight. Substrate combinations explained under materials and methods section. \* - p<0.05 vs. ND group, # - p<0.05 vs. STZ+I group. Values are means +/- SEM N=13 (except panel C, N=8).

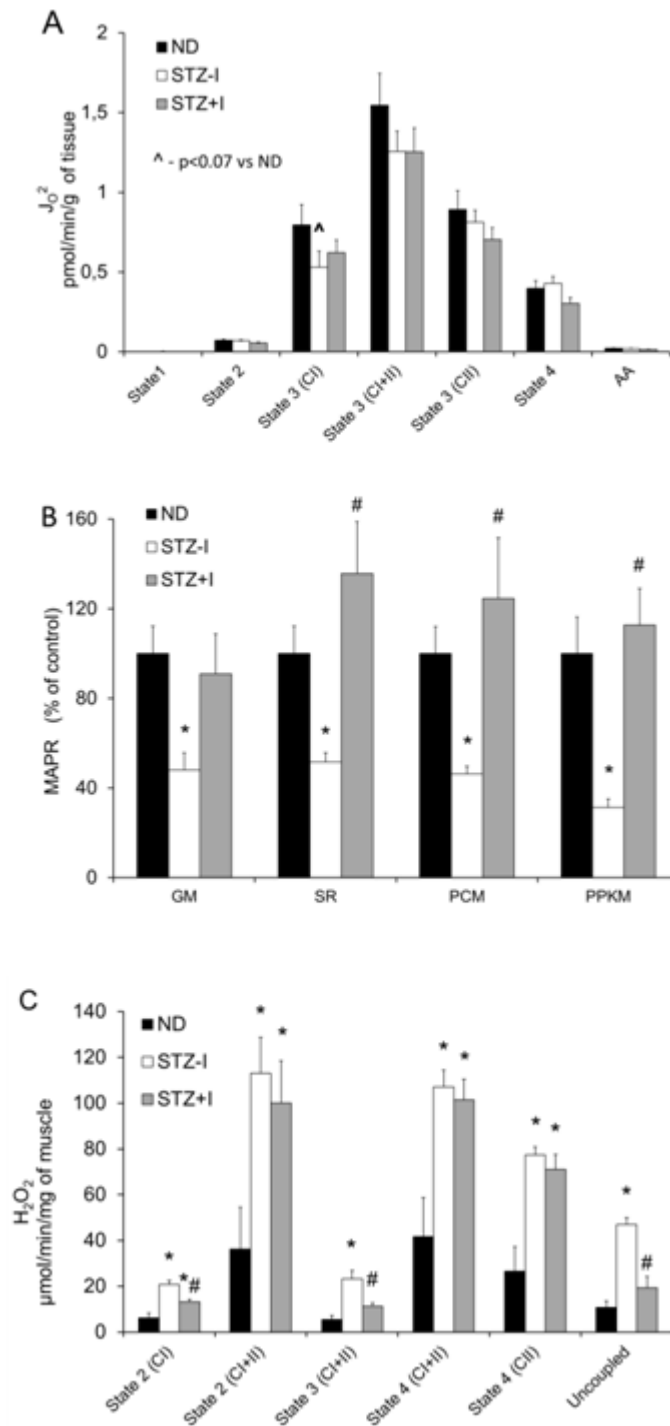

SUPPLEMENTARY DATA

**Supplementary Figure S3. Insulin treatment does not fully corrects mitochondrial proteome changes induced by insulin deprivation.** Panel A shows expression of 242 proteins significantly ( $p < 0.05$ ) different from non-diabetic (ND) group in both the STZ-I and STZ+I animals. Proteins not corrected by insulin treatment are located in quadrant III (down-regulated in both STZ-I and STZ+I,  $n=118$ ) and in quadrant I (up-regulated in both STZ-I and STZ+I,  $n=58$ ). Proteins in quadrants II ( $n=5$ ) and IV ( $n=27$ ) have the opposite expression pattern and are therefore regulated by insulin. Values from STZ+I vs. ND and STZ-I vs. ND comparison are given on X and Y axis, respectively. Panel B presents significantly altered pathways ( $p < 0.05$ ,  $-\log_{10} p\text{-value} > 1.3$ ) associated with proteins from respective I-IV quadrants. Detailed expression data for individual mitochondrial proteins is presented in **Table S4**.

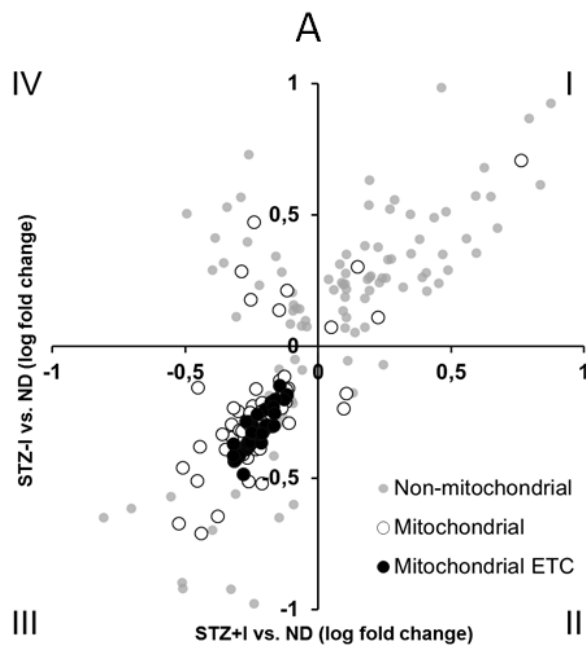

|                                                                                                                 |                                                                            |
|-----------------------------------------------------------------------------------------------------------------|----------------------------------------------------------------------------|
| <b>Upregulated in STZ-I<br/>Downregulated in STZ+I</b>                                                          | <b>Upregulated in STZ-I<br/>Upregulated in STZ+I</b>                       |
| NRF2 Oxidative Stress Response<br>DNA Damage Regulation<br>Fatty Acids Transport<br>Glucose and GP1 Degradation | Calcium Signaling*<br>Actin Cytoskeleton Signaling<br>Glycerol-3-P Shuttle |
| <b>Downregulated in STZ-I<br/>Downregulated in STZ+I</b>                                                        | <b>Downregulated in STZ-I<br/>Upregulated in STZ+I</b>                     |
| Mitochondrial Dysfunction<br>TCA Cycle<br>Fatty Acid $\beta$ -oxidation<br>Mitochondrial L-carnitine Shuttle    | Actin Cytoskeleton Signaling                                               |

SUPPLEMENTARY DATA

**Supplementary Figure S4.** PPARK7 protein responsible for ROS-related mitophagy is up regulated within mitochondria of STZ-diabetic mice, despite overall decrease in mitochondrial protein content. Mitochondrial loading VDAC1 (non-selective mitochondrial anion channel) or COX41 (subunit of mitochondrial electron transport chain) was used to normalize mitochondrial expression of PARK7 across experimental groups. N=6 per group.

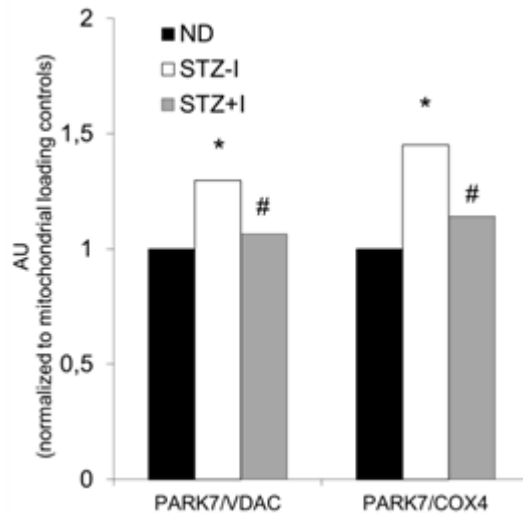

**Supplementary Figure S5.** Insulin deprivation increases the abundance of semi-tryptic peptides from mitochondrial proteins, which is corrected by insulin treatment. **Panel A** presents total number of semi-tryptic peptides from all skeletal muscle proteins, from both the experimental (light) and SILAC (heavy, graph bars to left) animals and from experimental animals only (light, bar graphs to right). **Panel B** presents total number of semi-tryptic peptides from proteins of mitochondrial origin. The increase in the number of semi-tryptic peptides is visible only for experimental animals in insulin-deprived group N=3 per group. Values represent mean +/- SEM. \* -p<0.0001 compared to non-diabetic (ND) group values; # -p<0.0001 as compared to diabetic, insulin treated group (STZ+I).

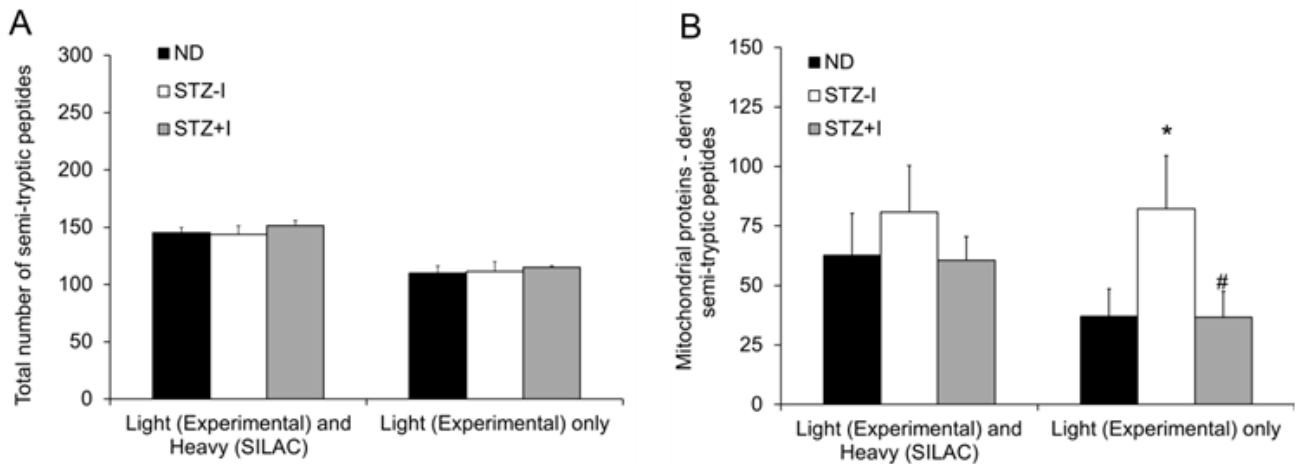

SUPPLEMENTARY DATA

**Supplementary Figure S6.** Insulin deprivation in STZ-diabetic animals significantly decreases mixed muscle protein (MMP) fractional synthesis rate (FSR) in different skeletal muscles, which is partially corrected by insulin treatment. Values are expressed as a mean % /day (N=3 per group), +/- SEM \* - p<0.05 compared to non-diabetic (ND) group values; # -p<0.05 as compared to diabetic, insulin treated group (STZ+I).

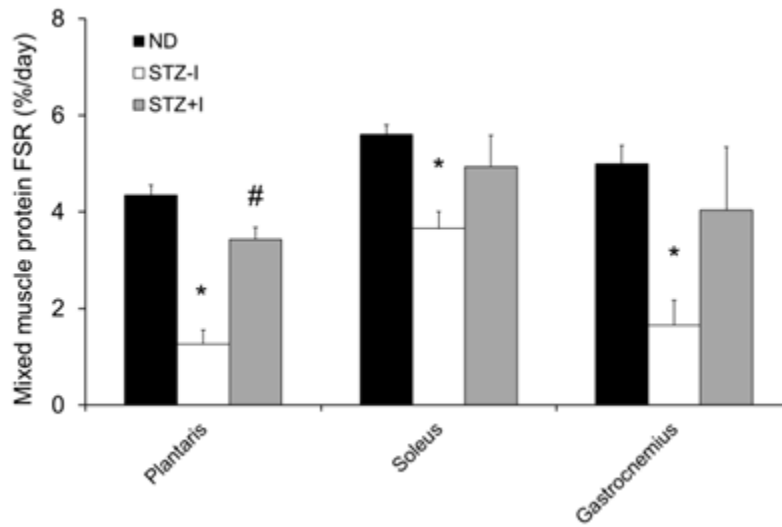

Supplement: supp_db15-0823_DB150823SupplementaryData2.pdf [file supp_db15-0823_DB150823SupplementaryData2.pdf]
